1       **Integrative Molecular Characterization of Sarcomatoid and Rhabdoid Renal**  
2       **Cell Carcinoma Reveals Determinants of Poor Prognosis and Response to**  
3       **Immune Checkpoint Inhibitors**

4       **Authors:**

5       Ziad Bakouny<sup>1</sup>, David A. Braun<sup>1</sup>, Sachet A. Shukla<sup>2</sup>, Wenting Pan<sup>1</sup>, Xin Gao<sup>3</sup>, Yue  
6       Hou<sup>2</sup>, Abdallah Flaifel<sup>4</sup>, Stephen Tang<sup>1</sup>, Alice Bosma-Moody<sup>1</sup>, Meng Xiao He<sup>1</sup>,  
7       Natalie Vokes<sup>1</sup>, Jackson Nyman<sup>1</sup>, Wanling Xie<sup>5</sup>, Amin H. Nassar<sup>1</sup>, Sarah Abou  
8       Alaiwi<sup>1</sup>, Ronan Flippot<sup>1</sup>, Gabrielle Bouchard<sup>1</sup>, John A. Steinharter<sup>1</sup>, Pier Vitale  
9       Nuzzo<sup>1</sup>, Miriam Ficial<sup>4</sup>, Miriam Sant'Angelo<sup>4</sup>, Juliet Forman<sup>1,2,10</sup>, Jacob E. Berchuck<sup>1</sup>,  
10      Shaan Dudani<sup>6</sup>, Kevin Bi<sup>1</sup>, Jihye Park<sup>1</sup>, Sabrina Camp<sup>1</sup>, Maura Sticco-Ivins<sup>4</sup>, Laure  
11      Hirsch<sup>1</sup>, Megan Wind-Rotolo<sup>7</sup>, Petra Ross-Macdonald<sup>7</sup>, Maxine Sun<sup>1</sup>, Gwo-Shu Mary  
12      Lee<sup>1</sup>, Steven L. Chang<sup>1</sup>, Xiao X. Wei<sup>1</sup>, Bradley A. McGregor<sup>1</sup>, Lauren C.  
13      Harshman<sup>1</sup>, Giannicola Genovese<sup>8</sup>, Leigh Ellis<sup>4,9</sup>, Mark Pomerantz<sup>1</sup>, Michelle S.  
14      Hirsch<sup>4</sup>, Matthew L. Freedman<sup>1</sup>, Michael B. Atkins<sup>10</sup>, Catherine J. Wu<sup>1,11</sup>, Thai H.  
15      Ho<sup>12</sup>, W. Marston Linehan<sup>13</sup>, David F. McDermott<sup>14</sup>, Daniel Y.C. Heng<sup>6</sup>, Srinivas R.  
16      Viswanathan<sup>1</sup>, Sabina Signoretti<sup>4,9</sup>, Eliezer M. Van Allen<sup>1\*</sup>, and Toni K. Choueiri<sup>1\*</sup>

17      \* Equal Contribution

18      **Affiliations:**

- 19      1. Department of Medical Oncology, Dana-Farber Cancer Institute, Boston,  
20      Massachusetts.  
21      2. Translational Immunogenomics Laboratory, Dana-Farber Cancer Institute,  
22      Boston, Massachusetts.  
23      3. Department of Medicine, Massachusetts General Hospital Cancer Center,  
24      Boston, Massachusetts.  
25      4. Department of Pathology, Brigham and Women's Hospital, Boston,  
26      Massachusetts.  
27      5. Department of Data Sciences, Dana-Farber Cancer Institute, Boston,  
28      Massachusetts.  
29      6. Tom Baker Cancer Centre, University of Calgary, Calgary, Alberta, Canada.  
30      7. Bristol-Myers Squibb, Princeton, New Jersey.  
31      8. Department of Genomic Medicine, The University of Texas MD Anderson  
32      Cancer Center, Houston, Texas  
33      9. Department of Oncologic Pathology, Dana-Farber Cancer Institute, Boston,  
34      Massachusetts.  
35      10. Lombardi Comprehensive Cancer Center, Georgetown University Medical  
36      Center, Washington, District of Columbia.  
37      11. Broad Institute of MIT and Harvard, Cambridge, Massachusetts.  
38      12. Division of Hematology and Medical Oncology, Mayo Clinic, Scottsdale,  
39      Arizona.  
40      13. Urologic Oncology Branch, Center for Cancer Research, National Cancer  
41      Institute, NIH, Bethesda, Maryland.  
42      14. Beth Israel Deaconess Medical Center, Boston, Massachusetts.

43  
44      **Correspondence to:**

45      **Eliezer M. Van Allen**, MD, Department of Medical Oncology, Dana-Farber Cancer  
46      Institute, 450 Brookline Ave, Boston, Massachusetts, 02215  
47      (eliezer\_m\_vanallen@dfci.harvard.edu). Tel: +1 617 6322429

48 **Toni K. Choueiri**, MD, Department of Medical Oncology, Dana-Farber Cancer  
49 Institute, 450 Brookline Ave, Boston, Massachusetts, 02215  
50 (Toni\_Choueiri@dfci.harvard.edu). Tel: +1 617 632456

51

52 **Abstract word count:** 147 words

53 **Main text word count:** 4448 words

54 **Methods word count:** 3655

55 **Figures:** 4

56 **Supplementary Figures:** 15

57 **Supplementary Tables:** 13

58 **Abstract**

59 Sarcomatoid and rhabdoid (S/R) renal cell carcinoma (RCC) are highly aggressive  
60 tumors with limited molecular and clinical characterization. Emerging evidence  
61 suggests immune checkpoint inhibitors (ICI) are particularly effective for these  
62 tumors<sup>1-3</sup>, although the biological basis for this property is largely unknown. Here, we  
63 evaluate multiple clinical trial and real-world cohorts of S/R RCC to characterize their  
64 molecular features, clinical outcomes, and immunologic characteristics. We find that  
65 S/R RCC tumors harbor distinctive molecular features that may account for their  
66 aggressive behavior, including *BAP1* mutations, *CDKN2A* deletions, and increased  
67 expression of *MYC* transcriptional programs. We show that these tumors are highly  
68 responsive to ICI and that they exhibit an immune-inflamed phenotype characterized  
69 by immune activation, increased cytotoxic immune infiltration, upregulation of antigen  
70 presentation machinery genes, and PD-L1 expression. Our findings shed light on the  
71 molecular drivers of aggressivity and responsiveness to immune checkpoint  
72 inhibitors of S/R RCC tumors.

73 **Keywords:** sarcomatoid, rhabdoid, renal cell carcinoma, immune checkpoint  
74 inhibitor

75 **Main Text**

76 **Introduction**

77 Sarcomatoid and rhabdoid (S/R) renal cell carcinoma (RCC) are among the most  
78 aggressive forms of kidney cancer<sup>4,5</sup>. Sarcomatoid and rhabdoid features represent  
79 forms of dedifferentiation of RCC tumors and can occur in the same tumor or  
80 independently of each other<sup>6</sup>. These features can develop over any background  
81 RCC histology, including clear cell, papillary, and chromophobe RCC. These tumors  
82 account for 10-15% of RCC and most patients with S/R RCC present with metastatic  
83 disease<sup>4,7</sup>. While classic RCC therapies such as VEGF and mTOR targeted  
84 therapies are largely ineffective for these tumors, multiple clinical studies suggest  
85 that immune checkpoint inhibitors (ICI) may have significant clinical activity in  
86 sarcomatoid and rhabdoid RCC<sup>1-3,8-11</sup>. Prior studies have hinted that these tumors  
87 may harbor distinctive molecular features, although these studies were limited by  
88 small sample sizes, restricted molecular analyses, leading to discordant  
89 conclusions<sup>2,12-15</sup>.

90 To define the molecular properties underlying the S/R clinical subtype and determine  
91 their relationship to potentially enhanced response to ICI, we perform an expanded  
92 clinical and molecular integrated characterization of S/R RCC in both clinical trial and  
93 real-world cohorts, assessing clinical outcomes on ICI, genomic and RNA  
94 sequencing (RNA-seq), immunohistochemical (IHC) staining for PD-L1,  
95 immunofluorescence (IF)-based assessment of immune infiltration, and  
96 transcriptomic evaluation of sarcomatoid cell lines (Fig. 1a).

## 97 **Results**

### 98 **S/R RCC Tumors Harbor Distinctive Genomic Features**

99 We first evaluated the genomic landscape of S/R RCC (total N= 208) in three distinct  
100 cohorts (two whole exome sequencing [WES] and 1 gene panel sequencing cohort  
101 [OncoPanel]) and compared it to that of non-S/R RCC (total N= 1565; Table S1).  
102 This DNA-sequencing cohort included one clinical trial WES cohort (CheckMate  
103 cohort), a retrospective analysis of an institutional panel-based sequencing cohort  
104 (OncoPanel cohort), and a retrospective pathologic review and analysis of a publicly  
105 available cohort (TCGA cohort). The most commonly altered genes in S/R RCC (Fig.  
106 S1) were generally similar to those previously reported for RCC<sup>16</sup>. We subsequently  
107 compared the genomic features of S/R RCC tumors to background histology-  
108 matched non-S/R RCC tumors across the three cohorts. Tumor mutational burden  
109 (TMB), total indel load, and frameshift indel load were overall similar between S/R  
110 RCC and non-S/R RCC tumors (Fig. S2a-c). While the frameshift indel load was  
111 significantly increased ( $p= 0.024$ ) in S/R vs. non-S/R RCC in the OncoPanel cohort,  
112 the absolute difference was small and was not corroborated in the two WES cohorts  
113 (CheckMate and TCGA; Fig. S2c).

114 Next, gene-specific alteration rates were compared between S/R and non-S/R RCC  
115 in each of the three cohorts independently and in combination (Methods). *BAP1* and  
116 *NF2* somatic alterations were significantly and consistently enriched in S/R  
117 compared to non-S/R RCC, whereas *KDM5C* somatic alterations were significantly  
118 less frequent in S/R compared to non-S/R RCC (Fisher's exact  $q<0.05$ ; Fig. 1b and  
119 Table S2). Furthermore, *CDKN2A* and *CDKN2B* deep deletions as well as *EZH2* and  
120 *KMT2C* high amplifications were significantly enriched in S/R compared to non-S/R

121 (Fisher's exact  $q < 0.05$  and consistent across at least two of the three included  
122 datasets; Fig. 1b and Table S2). Other genes that were significantly amplified (low or  
123 high amplification) included *MYC* and *CCNE1*, whereas those that were significantly  
124 deleted (shallow or deep deletion) included *RB1* and *NF2* (Fisher's exact  $q < 0.05$ ).  
125 Although recent reports have suggested that genes in the 9p24.1 locus (including  
126 *CD274*, *JAK2*, and *PCD1LG2* genes) were more frequently amplified in RCC tumors  
127 with sarcomatoid features<sup>2,17</sup>, we did not observe focal amplifications to be enriched  
128 at this locus (Table S2). Moreover, differences between S/R and non-S/R RCC were  
129 generally consistent regardless of background histology (clear cell or non-clear cell;  
130 Table S2).

131 Since the analyses in this study are based on single region sampling of S/R RCC  
132 tumors and since such sampling has been shown to affect the detection rate of  
133 mutations in RCC tumors<sup>18</sup>, we next compared the intra-tumoral heterogeneity (ITH)  
134 index between S/R and non-S/R RCC tumors (Methods). We found that the ITH  
135 index was not significantly different between these two groups of tumors in the  
136 CheckMate cohort. Furthermore, this was corroborated in a re-analysis of the  
137 TRACERx Renal study, whereby the ITH index did not differ between S and non-S  
138 RCC tumors (Fig. S3a). Moreover, among 71 S/R RCC tumors in the OncoPanel  
139 cohort (of a total of 79 S/R RCC tumors) for which the portion of the tumor that was  
140 sequenced was assessable, 44 tumors had the S/R (mesenchymal) regions  
141 sequenced and 27 had the non-S/R (epithelioid) regions of the tumor sequenced.  
142 These two subsets of tumors were compared and no significant overall  
143 mutation/indel load (Fig S3b) or gene-level mutational (Table S3) differences were  
144 found, other than a marginal but statistically significant ( $p = 0.042$ ) increase in the  
145 number of frameshift indels in mesenchymal regions. In addition, panel sequencing

146 mutation data from 23 sarcomatoid tumors that had been laser micro-dissected (into  
147 sarcomatoid and epithelioid components) and sequenced separately from the study  
148 by Malouf et al.<sup>19</sup> was re-analyzed. In accordance, with the above findings no  
149 significant overall mutation/indel load (Fig S3c) or gene-level mutational (Table S3)  
150 differences were found. However, it should be noted that alteration frequency for  
151 certain genes differed between mesenchymal and epithelioid portions of S/R RCC  
152 tumors (Table S3). While certain mutations may be enriched in these tumors (in  
153 particular TP53 mutations, as has been previously suggested<sup>14</sup>), none rose to the  
154 level of statistical significance in our cohort. Overall, our results suggest that the  
155 mutational differences between S/R and non-S/R RCC tumors are more pronounced  
156 than intra-tumoral mutational differences between mesenchymal and epithelioid  
157 portions of a given S/R RCC tumor. S/R RCC tumors have a distinctive genomic  
158 profile characterized by an enrichment for genomic alterations previously associated  
159 with poor prognosis in RCC (such as *BAP1* and *CDKN2A*) and genomic alterations  
160 that may represent therapeutic targets in S/R RCC (*CDKN2A* and *CDKN2B*  
161 deletions, *EZH2* amplifications, and *NF2* mutations).

162

### 163 **Transcriptomic Programs of S/R RCC Underpin their Poor Prognosis**

164 We next assessed transcriptomic programs in S/R RCC and their relationship to the  
165 known poor prognosis of this subtype. We compared RNA-seq data between S/R  
166 (total N= 98) and non-S/R RCC (total N= 1076) in the TCGA (publicly available) and  
167 CheckMate cohorts independently (Methods; Table S4) using Gene Set Enrichment  
168 Analysis (GSEA)<sup>20</sup>. Twelve gene sets were upregulated (GSEA  $q < 0.25$ ) in S/R  
169 compared to non-S/R RCC in the two cohorts independently, including cell cycle

170 programs, genes regulated by *MYC*, and apoptosis programs (Fig. 2a; Table S5).  
171 Specific upregulated gene sets may account for their morphological features  
172 including their mesenchymal appearance<sup>6</sup> (upregulation of epithelial-mesenchymal-  
173 transition [EMT]) and frequent co-occurrence of necrosis (endoplasmic reticulum  
174 [ER] stress and apoptosis-caspase pathway)<sup>4,7</sup>, and rapid progression (E2F targets,  
175 G2/M checkpoint, mitotic spindle assembly). Moreover, high *MYC* targets version 1  
176 (v1) expression as quantified by single sample GSEA (ssGSEA) scores<sup>21</sup>  
177 significantly correlated with worse clinical outcomes in both the subset of patients  
178 with S/R in the anti-PD-1 (nivolumab) arm of the CheckMate cohort as well as the  
179 subgroup of stage IV S/R RCC patients in TCGA independently (Fig. 2b; Fig. S4;  
180 Table S6). Of note, the majority of founder gene sets of both the *MYC* v1 and v2  
181 “Hallmark” gene were enriched in S/R RCC (Fig. S5a), further corroborating the fact  
182 that *MYC*-regulated transcriptional programs are enriched in S/R RCC. Moreover,  
183 the correlation with outcomes within S/R RCC of the *MYC* v1 score was consistent  
184 when the *MYC*-regulated transcriptional program was measured using the separate  
185 but related *MYC* v2 “Hallmark” gene set (Fig. S5b-c). Patients with non-S/R RCC  
186 and *MYC* v1 scores similar to those of S/R RCC (above the median of the S/R RCC  
187 group for *MYC* v1) had significantly worse outcomes in both the TCGA and  
188 CheckMate PD-1 cohorts (Fig. 2c; Fig. S4; Table S6). These results indicate that a  
189 *MYC*-driven transcriptional program is driving the aggressive phenotype of S/R RCC  
190 tumors (also shared with a subset of non-S/R RCC)<sup>5</sup>.

191 Extending from the Hallmark GSEA analysis, 243 genes had significantly increased  
192 expression in S/R compared to non-S/R RCC independently across the two cohorts,  
193 including multiple cell cycle and proliferation (*CCNB1*, *CDC45*, *CDC6*, *CDCA3*,  
194 *CDCA7*, *CDCA8*, *CDK6*, and *MKI67*), immune (*HIVEP3*, *IFI16*, *IFI35*, *IL15RA*, and



195 *LAG3*), and metastasis-implicated<sup>22</sup> (*ACTB*, *ANLN*, *ARPC1B*, *ARPC5*, and *ARPC5L*,  
196 *CD44*) genes as well as chemokine (*CXCL9*) and antigen presenting machinery  
197 (*TAP1*, *TAP2*, *CALR*, *PSMA5*, *PSMB10*, *PSMB4*, *PSMC2*, *PSME2*) genes that may  
198 be driving the immune infiltration in these tumors (Table S7). Since the  
199 overexpression of antigen presentation machinery genes has been found to correlate  
200 with increased cytotoxic immune infiltration and ICI responsiveness<sup>23</sup>, we further  
201 explored the antigen presentation machinery genes using four dedicated  
202 REACTOME<sup>24</sup> and KEGG<sup>25</sup> gene sets and found all four to be significantly increased  
203 in both the CheckMate and TCGA cohorts independently (Table S5). In addition, 83  
204 genes had significantly decreased expression including cell junction-implicated  
205 (*TJP1* and *DSC2*) and cell differentiation genes (*MUC4*; Table S7).

206

## 207 **S/R RCC Tumors Display Marked Sensitivity to Immune Checkpoint Inhibitors** 208 **and an Immune-Inflamed Phenotype**

209 With the unique molecular background of S/R RCC defined, we then sought to  
210 establish whether S/R RCC patients treated by immune checkpoint inhibitors (ICI)  
211 had improved clinical outcomes, as suggested by early studies, and whether  
212 particular molecular features established the basis for such clinical phenotypes.  
213 Patients with S/R RCC had improved outcomes on ICI compared to non-ICI agents  
214 across 3 cohorts (total N ICI arms = 237; total N non-ICI arms = 1013; Table S8): a  
215 local Harvard cohort, the multicenter International Metastatic RCC Database  
216 Consortium (IMDC) cohort, and a pooled analysis of the S/R subgroup of 2 clinical  
217 trials (CheckMate 010<sup>26</sup> and CheckMate 025<sup>27</sup>) evaluating an anti-PD-1 agent  
218 (nivolumab) for metastatic RCC. Patients with S/R RCC had significantly improved

219 outcomes on ICI compared to non-ICI across cohorts and clinical outcomes including  
220 overall survival (OS), progression free survival (PFS), time to treatment failure (TTF),  
221 and objective response rate (ORR; Fig. 3a-c).

222 Given the significant sensitivity of S/R RCC to ICI as reflected by improved  
223 responses and survival outcomes, we examined molecular features that may drive  
224 this phenotype. First, GSEA on the immune “Hallmark” gene sets of the RNA-seq  
225 data of the TCGA and CheckMate cohorts showed that all 8 “Hallmark” immune  
226 gene sets were enriched (GSEA  $q < 0.25$ ) in S/R compared to non-S/R RCC in the  
227 two cohorts independently (Fig. 4a; Table S4), including gene sets previously  
228 implicated in response to ICI (e.g. interferon gamma response)<sup>28,29</sup>. We then inferred  
229 immune cell fractions using the CIBERSORTx deconvolution algorithm (total N of  
230 S/R= 97 and Total N of non-S/R= 1028) and previously described gene signatures  
231 for Th1, Th2, and Th17 cells<sup>30</sup> on the RNA-seq data from the CheckMate and TCGA  
232 cohorts. CD8+ T cell infiltration, CD8+/CD4+ T cell ratio, activated/resting NK cell  
233 ratio, M1 macrophages, M1/M2 macrophage ratio, as well as the Th1 score were all  
234 significantly increased (Mann-Whitney  $q < 0.05$ ) in S/R RCC in both cohorts  
235 independently (Fig. 4b, Fig S6a; Table S9). Moreover, the transcriptomic and  
236 immune microenvironment features of S/R RCC were consistent across S/R RCC  
237 subtypes (rhabdoid, sarcomatoid, or sarcomatoid and rhabdoid; Fig. S7-9).

238 The immune-inflamed phenotype of S/R RCC tumors was further corroborated by an  
239 immunohistochemistry (IHC; N of S/R= 118 and N of non-S/R= 691) assay showing  
240 significantly increased PD-L1 (cut-off of  $\geq 1\%$ ) expression on tumor cells in S/R  
241 compared to non-S/R tumors (43.2% vs. 21.0%; Fisher’s exact  $p < 0.001$ ; Fig 4c and  
242 Table S10) in the CheckMate cohort. To evaluate whether the elevated PD-L1  
243 expression in S/R RCC is driven by PD-L1 gene amplification, as previously

244 reported<sup>2,17</sup>, we compared IHC-based PD-L1 expression by *CD274* (or PD-L1) gene  
245 copy number status (N= 63 patients in the S/R CheckMate cohort). We found that  
246 S/R tumors had increased PD-L1 expression (relatively to non-S/R RCC)  
247 independent of *CD274* copy number status (any deletion, amplification, or neither; all  
248 deletions were one-copy deletions); although the three S/R patients with *CD274*  
249 gene amplification (1 patient with high amplification and 2 with low amplifications) all  
250 expressed PD-L1 by IHC above the cut-off of  $\geq 1\%$ . Moreover, *CD274* copy number  
251 status did not correlate with clinical outcomes in patients treated with a PD-1 inhibitor  
252 (Fig. S10a-c). The immune-inflamed phenotype of S/R RCC tumors was also  
253 evaluated by IF staining for CD8+ T cells in a subset of the CheckMate cohort (N of  
254 S/R= 29 and N of non-S/R= 186; Fig S6b-c and Table S10). CD8+ T cell infiltration at  
255 the tumor invasive margin, which had been reported to be associated with response  
256 to ICI-based therapies<sup>31</sup>, tended to be increased in these tumors (although the  
257 difference was not statistically significant, Mann-Whitney  $p= 0.14$ ). Since *BAP1*  
258 mutations are enriched in S/R RCC tumors in this study and have been previously  
259 associated with immune infiltration and inflammation<sup>32</sup>, we evaluated whether the  
260 immune findings reported in this study are driven by *BAP1* mutations. In a sensitivity  
261 analysis excluding all *BAP1* mutants (from the S/R and non-S/R RCC) groups, the  
262 immune findings reported in this study were found to be largely consistent with the  
263 results of the primary analysis, suggesting that the immune findings of the current  
264 study in S/R RCC tumors are not driven by *BAP1* mutations (Fig. S11). Taken  
265 together, S/R RCC tumors are highly responsive to ICI-based therapies and an  
266 immune-inflamed microenvironment in S/R RCC may be driving these responses in  
267 a *BAP1*-independent manner, leading to improved survival on ICI.

268

## 269 **Sarcomatoid Cell Lines Recapitulate the Biology of S/R RCC tumors**

270 To evaluate which transcriptomic programs enriched in S/R RCC tumors were  
271 attributable to sarcomatoid cancer cells rather than the microenvironment, we  
272 compared baseline RNA-seq data from 6 distinct sarcomatoid kidney cancer cell  
273 lines and 9 distinct non-sarcomatoid kidney cancer cell lines (Fig S12a-b; Table  
274 S11). The transcriptional profile observed from the bulk profiling of tumors was  
275 partially recapitulated in the cell lines, with EMT and apoptosis-caspase pathway  
276 genes significantly enriched in sarcomatoid cell lines compared with non-  
277 sarcomatoid cell lines (Fig S12b). Given the shared transcriptional programs  
278 between sarcomatoid tumors and cell lines, we then sought to nominate candidate  
279 pathways that might reflect selective dependencies of sarcomatoid tumor cells. For  
280 this exploratory analysis, we interrogated publicly available data from 20 kidney  
281 cancer cell lines with both baseline RNA-seq and cell line drug response data.  
282 Among this group of 20 kidney cancer cell lines screened with 437 compounds of  
283 diverse mechanisms of action, we found EMT and apoptosis-caspase pathway  
284 ssGSEA scores most strongly correlated with sensitivity to cyclin dependent kinase  
285 inhibitors (CDKi; Fig. S12c; Table S11) and compared favorably to other classic  
286 therapeutic targets in RCC such as VEGF and mTOR inhibitors, consistent with the  
287 poor response of S/R RCC tumors to these agents<sup>5,33</sup>. In an attempt to corroborate  
288 these findings we focused on two CDKi agents, SNS-032 and alvocidib, that  
289 displayed a strong correlation of their sensitivity profiles with the EMT and apoptosis-  
290 caspase signature scores in CTRP (Fig. S12; Fig. S13a-b; Table S11). In an  
291 independent in silico analysis of the recently published PRISM cell line drug screen  
292 dataset<sup>34</sup>, a similar relationship between sensitivity to CDKi and the EMT and  
293 apoptosis signatures was found for alvocidib and other CDKi (Fig. S13a; Table S10;

294 SNS-032 was not tested in the PRISM dataset). SNS-032, alvocidib, and a VEGF  
295 inhibitor control agent (axitinib) were also separately evaluated in two sarcomatoid  
296 RCC cell lines (UOK127 and RCJ41-T2; not included in the CTRP or PRISM  
297 screens) and three non-sarcomatoid RCC cell lines (Caki-2, KMRC-20, and KMRC-  
298 2; included in the CTRP or PRISM screens). Although the relative sensitivities for the  
299 non-sarcomatoid cell lines determined in CTRP/PRISM globally mirrored relative  
300 sensitivities upon validation, we did not observe marked differential sensitivity  
301 between sarcomatoid and non-sarcomatoid cell lines for any of the 3 agents tested  
302 (Fig S14).

### 303 **Discussion**

304 The current study represents a large integrative molecular and clinical  
305 characterization of S/R RCC, including clinical outcomes on ICI therapies and non-  
306 ICI controls from both clinical trial and retrospective cohorts, DNA and RNA-  
307 sequencing data, IHC and IF-based assessment of the immune microenvironment,  
308 and the molecular profiling of cell line models of the disease. We show that S/R RCC  
309 tumors are highly responsive to ICIs, harbor distinctive genomic alterations, a  
310 characteristic transcriptional program characterized by the enrichment of *MYC*-  
311 regulated genes that correlates with poor outcomes, and a heavily inflamed  
312 microenvironment enriched in features that have been associated with ICI  
313 responses.

314 Our genomic findings corroborate those of prior studies that reported significant  
315 enrichment of Hippo pathway (which includes the *NF2* gene) mutations<sup>19</sup> in S vs  
316 non-S RCC tumors and *BAP1* mutations in S and R RCC tumors<sup>12,15,35</sup>. While  
317 *CDKN2A* alterations have been reported in S RCC tumors<sup>13,19</sup>, these alterations are

318 also present in non-S/R RCC tumors<sup>36</sup>. However, the current study established  
319 *CDKN2A/B* deep deletions as specifically enriched in S/R compared to non-S/R RCC  
320 tumors as well as depletion in *KDM5C* mutations and enrichment in *EZH2*  
321 amplifications in S/R RCC tumors. Moreover, S/R RCC tumors were not found to  
322 consistently harbor a significantly increased rate of mutations, indels, or frameshift  
323 indels compared with non-S/R RCC tumors.

324 S/R RCC tumors are rapidly proliferating tumors that are associated with poor  
325 prognosis and rapid clinical progression<sup>37,38</sup>. While prior studies had identified  
326 multiple clinical and pathological factors that are associated with prognosis in  
327 patients with S/R RCC tumors<sup>39,40</sup>, the molecular drivers of aggressivity of S/R RCC  
328 tumors had largely been unexplored. Here, we show that multiple molecular  
329 pathways implicated in cell cycle regulation and invasiveness as well as *MYC*-  
330 regulated genes are enriched in S/R RCC tumors and that the enrichment in *MYC*-  
331 regulated genes correlates with poor prognosis. These results suggest that *MYC*-  
332 regulated transcriptional programs are key factors driving the aggressivity and poor  
333 prognosis associated with S/R RCC tumors.

334 While prior studies have largely reported on tumors with sarcomatoid features, the  
335 different cohorts of this study highlight that rhabdoid features frequently co-occur  
336 with sarcomatoid features (10-20% of S/R RCC tumors). In addition, tumors  
337 harboring rhabdoid features alone are also relatively frequent (5-25% of S/R RCC  
338 tumors). In this study, the molecular features of S, R, and S+R (harboring both  
339 features concurrently) tumors were not found to be significantly different (Figure S1  
340 and Figures S7-S9). However, detecting smaller effect sizes in these comparisons  
341 was limited by the relatively small sample sizes of the R and S+R groups.

342 The preliminary clinical outcomes of the subgroups of patients with S RCC from four  
343 large randomized clinical trials of the first line treatment of metastatic RCC<sup>8-11</sup>  
344 reported ORRs ranging between 46.8% and 58.8% for patients with S RCC treated  
345 with first line ICI combinations, with a significant clinical benefit compared to the non-  
346 ICI control arms (sunitinib in all four trials). These results for ICI arms are numerically  
347 superior to those reported in the current study (ORR range 24.1-36.1% in ICI arms).  
348 Multiple potential factors could account for the increased effectiveness observed in  
349 these preliminary reports of subgroup analyses of phase III randomized controlled  
350 trials, compared to the findings in the three cohorts included in the current study.  
351 Indeed, the ICI arms in these studies were combination therapies (either PD-1  
352 inhibitor + CTLA-4 inhibitor or PD-(L)1 + VEGF inhibitor) and all patients were being  
353 treated in the first line setting (and therefore not previously refractory to other  
354 therapies). In the current study, patients with S/R RCC derived significant clinical  
355 benefit from ICI regimens while having been treated by various different ICI regimens  
356 (entirely ICI monotherapy in the CheckMate cohort and with a large proportion of ICI  
357 monotherapy in the IMDC and Harvard cohorts; Table S7) and across different lines  
358 of therapy in each of the three cohorts (with a substantial proportion in the second  
359 line and beyond). Our findings, derived from three independent cohorts, suggest that  
360 S/R RCC tumors derive benefit from ICI regimens even outside of the setting  
361 evaluated in the subgroup analyses of the above-mentioned phase III trials (first line  
362 ICI combination regimens).

363 These recent data indicating that S RCC tumors are highly responsive to ICI have  
364 generated interest in determining the underpinnings of this responsiveness. Prior  
365 studies had suggested that S RCC tumors had increased tumor PD-L1  
366 expression<sup>41,42</sup> and infiltration by CD8+ T cells<sup>42</sup>. These findings contrasted with



367 another study that had reported that TGF $\beta$  signaling, which has been associated with  
368 immune exclusion and resistance to ICIs<sup>43,44</sup>, was significantly increased in S RCC  
369 tumors<sup>15</sup>. More recently, two papers found that *CD274* (or PD-L1) gene  
370 amplifications are present in S RCC tumors and suggested that this genomic  
371 alteration may be underlying the increased PD-L1 tumor expression in these tumors  
372 and hypothesized that this genomic amplification may be underlying the immune  
373 responsiveness of S RCC tumors<sup>2,17</sup>. In the present study, the integrative analysis of  
374 WES, RNA-seq, tumor PD-L1 expression by IHC, tumor CD8+ T cell infiltration by IF,  
375 and clinical outcomes on ICI monotherapy from pre-treatment samples of patients  
376 with metastatic renal cell carcinoma on two clinical trials (CheckMate 010 and  
377 CheckMate 025) allowed the in-depth examination of the immune characteristics of  
378 these tumors. The present study corroborated the finding of increased PD-L1 tumor  
379 cell expression in S/R RCC and found that CD8+ T cell infiltration tended to be  
380 increased in these tumors. We did not find *CD274* gene focal amplification to be  
381 enriched in these tumors compared to non-S/R RCC tumors. The small number of  
382 S/R RCC tumors that harbored *CD274* gene amplification and had PD-L1 expression  
383 data available all expressed tumor cell PD-L1. However, the increased expression of  
384 tumor cell PD-L1 in S/R RCC tumors and the responsiveness of these tumors to PD-  
385 1 inhibitor monotherapy appeared to be independent of *CD274* gene amplification  
386 (Fig 4c and Fig S10a-c). In addition, the analysis of two independent cohorts of RCC  
387 with RNA-seq (CheckMate and TCGA), revealed multiple previously unreported  
388 characteristics of the immune contexture of these tumors. First, all 8 “Hallmark”  
389 immune gene sets (but not the “Hallmark” TGF $\beta$  gene set), including IL6-JAK-STAT3  
390 signaling and interferon gamma response, were enriched in S/R RCC tumors.  
391 Second, immune deconvolution revealed that multiple immune subsets that have



392 previously been associated with an immune responsive microenvironment are  
393 significantly increased in S/R RCC tumors, including M1 macrophages, activated NK  
394 cells, and the Th1 T cell subset. These findings were also found to be largely  
395 consistent across S and R RCC subsets (Fig S8-9). Third, the expression of antigen  
396 presentation machinery genes, which has been found to correlate with increased  
397 cytotoxic immune infiltration and ICI responsiveness<sup>23</sup>, were significantly increased in  
398 S/R RCC tumors (Tables S5 and S7).

399 In order to evaluate whether sarcomatoid cell line models recapitulate the biology of  
400 S/R RCC tumors, we compared the transcriptional profiles of 6 sarcomatoid cell lines  
401 to 9 non-sarcomatoid cell lines. Although less statistically powered to detect similar  
402 effect sizes to those observed in the bulk tumor S/R vs. non-S/R RCC comparison  
403 (due to a smaller sample size), the transcriptional programs of these cell lines  
404 partially recapitulated the biology of S/R RCC tumors. In particular, EMT and  
405 apoptosis-caspase pathway gene sets were significantly enriched in both S/R RCC  
406 tumors and sarcomatoid cell lines. These results suggest that at least some of the  
407 transcriptional findings reported in this study for S/R RCC are driven by the  
408 sarcomatoid tumor cells themselves and that sarcomatoid cell lines could serve as  
409 adequate models for these tumors in future therapeutic development efforts for this  
410 RCC subtype. Since the transcriptional programs of cell lines have been suggested  
411 to be most predictive of their sensitivity profiles (as opposed to other molecular  
412 features)<sup>34,45</sup>, these two signatures were then projected into two independent cell line  
413 drug screen datasets (CTRP and PRISM)<sup>34,46</sup>. Sensitivity to CDK inhibitors appeared  
414 to correlate strongly with EMT and apoptosis-caspase pathway signatures in both  
415 datasets independently (Fig. S12-13 and Table S11). The CDK inhibitors that scored  
416 in these analyses target multiple CDKs, including those involved in transcription and

417 cell cycle progression. We tested two CDKi (SNS-032 and alvocidib) along with a  
418 tyrosine kinase inhibitor control (axitinib) in two sarcomatoid and three non-  
419 sarcomatoid cell lines. The two sarcomatoid cell lines displayed decreased sensitivity  
420 to axitinib (a VEGF pathway inhibitor) as compared with the non-sarcomatoid cell  
421 line with the lowest EMT ssGSEA score, KMRC-20 (Fig. S12b and S14c),  
422 underscoring the limited response to this inhibitor of this canonical clear cell RCC  
423 pathway<sup>47</sup> in these sarcomatoid cell lines. Sarcomatoid and non-sarcomatoid RCC  
424 cell lines showed globally similar sensitivities to the two CDKis tested in our assay.  
425 The overall sensitivity of both sarcomatoid and non-sarcomatoid RCC lines to the  
426 two CDKis tested may be explained by the specificities of the particular drugs tested  
427 as well as the plasticity in EMT gene expression program, even among non-S/R  
428 RCCs, that may modulate sensitivity to this class of agents. Study of the precise  
429 molecular determinants of response to these and other classes of therapeutic agents  
430 in S/R RCC is a ripe area for future investigation.

431 A limitation of this study is the potential bias induced by the inherent heterogeneity of  
432 S/R RCC tumors. Foci of sarcomatoid and rhabdoid features can be present  
433 anywhere within RCC tumors. When these tumors are being evaluated by  
434 pathologists, these foci of S/R features can be missed and S/R RCC tumors could be  
435 mis-classified as non-S/R RCC. In this study, we reviewed the pathology reports and  
436 slides of tumors (Methods) to attempt to minimize such misclassifications. Moreover,  
437 any biases due to misclassification would be expected to decrease the power of this  
438 study to detect an effect, thereby potentially increasing the risk of false negative but  
439 not false positive findings. In addition to misclassification, intra-tumoral histological  
440 heterogeneity (sarcomatoid/rhabdoid vs epithelioid foci within the same S/R RCC  
441 tumor in a patient) could also be associated with intra-tumoral molecular

442 heterogeneity. In this study, using data from the present study and previously  
443 published studies, we find that the intra-tumoral mutational heterogeneity of S/R  
444 RCC tumors seems to be largely similar to that of non-S/R RCC tumors. In  
445 accordance with prior studies<sup>14</sup>, we find that mutations in certain genes (in particular  
446 *TP53*) may be enriched in S/R components of S/R RCC tumors. However, our  
447 overall analysis results suggest that mutational differences between S/R and non-  
448 S/R RCC tumors are greater than intra-tumoral mutational differences within S/R  
449 RCC tumors. The drivers of intra-tumoral histological heterogeneity require further  
450 evaluation and could be further investigated using novel single cell (DNA and/or  
451 RNA) and spatial transcriptomic methods.

452 In conclusion, our findings suggest that sarcomatoid and rhabdoid renal cell  
453 carcinoma tumors have distinctive genomic and transcriptomic features that may  
454 account for their aggressive clinical behavior. We also established that these tumors  
455 have significantly improved clinical outcomes on immune checkpoint inhibitors, which  
456 may be accounted for by an immune-inflamed phenotype; itself driven in part by  
457 upregulation of antigen presentation machinery genes in S/R RCC. Finally, our  
458 results suggest that sarcomatoid cell lines recapitulate the transcriptional programs  
459 of S/R RCC tumors and could serve as reasonably faithful models for these tumors,  
460 fueling the engine for future therapeutic discovery in this aggressive subtype of RCC.  
461 Further work is needed to determine whether other solid tumors with similar  
462 histological dedifferentiation components exhibit comparable molecular and clinical  
463 characteristics.

## 464 **Methods**

### 465 **Clinical Cohorts and Patient Samples**

466 The comparative clinical outcomes on immune checkpoint inhibitors (ICI) of patients  
467 with metastatic sarcomatoid and rhabdoid (S/R) renal cell carcinoma (RCC) were  
468 derived from: (1) CheckMate cohort (S/R RCC N = 120): two clinical trials evaluating  
469 an anti-PD-1 inhibitor (nivolumab) for metastatic clear cell RCC, CheckMate-025<sup>27</sup>  
470 (NCT01668784) and CheckMate-010<sup>26</sup> (NCT01354431), (2) Harvard cohort (S/R  
471 RCC N = 203): a retrospective cohort from the Dana-Farber/Harvard Cancer Center  
472 including patients from Dana-Farber Cancer Institute, Beth Israel Deaconess Medical  
473 Center, and Massachusetts General Hospital, (3) IMDC cohort (S/R RCC N = 927): a  
474 retrospective multi-center cohort of metastatic RCC that includes more than 40  
475 international cancer centers and more than 10,000 patients with metastatic RCC. All  
476 patients had consented to an institutional review board (IRB) approved protocol to  
477 participate in the respective clinical trials and to have their samples collected for  
478 tumor and germline sequencing (for the CheckMate cohort) or to have their clinical  
479 data retrospectively collected for research purposes (Harvard and IMDC cohorts).  
480 Analysis was performed under a secondary use protocol, approved by the Dana-  
481 Farber Cancer Institute IRB. For all cohorts, the definition of sarcomatoid and  
482 rhabdoid RCC tumors was based on the ISUP 2013 consensus definitions: tumors  
483 were classified as harboring sarcomatoid features if they had any percentage of  
484 sarcomatoid component and as harboring rhabdoid features if they had any  
485 percentage of rhabdoid component (regardless of the background histology)<sup>48</sup>. For  
486 the Harvard and IMDC cohorts, sarcomatoid and rhabdoid status were determined  
487 by retrospective reviews of pathology reports. For the CheckMate cohort,  
488 sarcomatoid and rhabdoid features were retrospectively identified by review of

489 pathology reports and of pathology slides by a pathologist. For the TCGA cohort, all  
490 pathology reports were first reviewed. Candidate sarcomatoid and/or rhabdoid cases  
491 were then reviewed by a pathologist. Cases that were unequivocal by the ISUP 2013  
492 consensus definitions by pathology report and/or slide review were included. The  
493 TCGA cohort also included a subset of sarcomatoid RCC patients that had been  
494 previously retrospectively identified<sup>15</sup>. All pathology slides and reports for TCGA  
495 were accessed using cbiportal (<https://www.cbiportal.org>). Specifically, the  
496 following datasets were used: Kidney Renal Clear Cell Renal Cell Carcinoma  
497 (TCGA, Provisional), Kidney Chromophobe (TCGA, Provisional), Kidney Renal  
498 Papillary Cell Carcinoma (TCGA, Provisional). The sarcomatoid and rhabdoid  
499 annotations for the samples identified in TCGA are reported in Table S12. The  
500 clinical characteristics of the patients in the CheckMate cohort with molecular  
501 sequencing data were similar to those of the overall trial (Braun et al., *Nature*  
502 *Medicine*, in press).

### 503 **Cell Lines**

504 Fifteen cell lines were acquired by our laboratory for baseline RNA-seq  
505 characterization including 6 that had been derived from sarcomatoid kidney cancer  
506 tumors (RCJ41M, RCJ41T1, RCJ41T2, BFTC-909, UOK127, and UOK276) and 9  
507 that had been derived from non-sarcomatoid kidney cancer tumors (786-O, A498,  
508 ACHN, Caki-1, Caki-2, KMRC-1, KMRC-2, KMRC-20, and VMRC-RCZ). UOK127  
509 and UOK276 were obtained from Dr. Linehan's laboratory at the National Cancer  
510 Institute (NCI) while RCJ41M, RCJ41T1, and RCJ41T2 were obtained from Dr. Ho's  
511 laboratory (Mayo Clinic, Phoenix, Arizona)<sup>49</sup>. Caki-1, Caki-2, A498, ACHN and 786-O  
512 were acquired from the American Type Culture Collection (ATCC). KMRC-1, KMRC-  
513 2, KMRC-20, VMRC-RCZ were obtained from JCRBbCell Bank and Sekisui

514 XenoTech, LLC. BFTC-909 was obtained from Leibniz-Institut (DSMZ-Deutsche  
515 Sammlung von, Mikroorganismen und Zellkulturen GmbH).  
516 Cell lines ACHN, VMRC-RCZ and 786-O were maintained in RPMI 1640 media  
517 (Gibco), supplemented with 10% FBS (Gibco) and 1% penicillin-streptomycin. Cell  
518 line A498 was maintained in EMEM media (Gibco), supplemented with 10% FBS  
519 (Gibco) and 1% penicillin-streptomycin. Caki-1 and Caki-2 were maintained in  
520 McCoy's 5A media (Gibco), supplemented with 10% FBS (Gibco) and 1% penicillin-  
521 streptomycin. KMRC-1, KMRC-2, KMRC-20, UOK127, UOK276, BFTC-909,  
522 RCJ41T1, RCJ41T2 and RCJ41M were maintained in DMEM media (Gibco),  
523 supplemented with 10% FBS (Gibco) and 1% penicillin-streptomycin. Cultures were  
524 grown in a 37 °C incubator with 5% CO<sub>2</sub>. Total RNAs were isolated using the Trizol®  
525 reagent (Invitrogen), according to the manufacturer's instructions.

526 For cell viability assays, cells were seeded in 96-well plates at densities ranging from  
527 1,000-10,000 cells per well, depending on the cell line. After 24 hours, axitinib  
528 (S1005, Selleck), alvocidib (S1230, Selleck), or SNS-032 (S1145, Selleck) was  
529 added to cells at the indicated final concentrations. DMSO treatment was used as a  
530 negative control. Cell viability for 3 biological replicates of each treatment condition  
531 was assessed after 72 hours after drug treatment using the CellTiter-Glo  
532 Luminescent Cell Viability Assay (G7571, Promega) and an EnVision Multilabel Plate  
533 Reader (PerkinElmer). Viability was calculated for each cell line relative to its  
534 respective DMSO control wells.

### 535 **RNA and DNA Extraction, Sequencing, and Pre-processing**

536 The methods used for DNA and RNA extraction and sequencing in the CheckMate  
537 010 and 025 trials are described in a separate paper in more detail (Braun et al.,

538 *Nature Medicine*, in press). Briefly, archived formalin-fixed paraffin embedded  
539 (FFPE) tissue from pre-treatment samples of patients enrolled in these two trials  
540 were used. DNA and RNA were extracted from tumor samples along with paired  
541 germline DNA from whole blood. Germline and tumor DNA were sequenced using  
542 Illumina HiSeq2500 following a 2x100 paired-end sequencing recipe and targeting a  
543 depth of coverage of 100x. RNA was sequenced using a stranded protocol using  
544 Illumina HiSeq2500 following a 2x50 paired-end sequencing recipe and targeting a  
545 depth of 50 million reads. Mean exome-wide coverage for tumor samples was 129x  
546 and 112x for matched germline. For the RNA-seq data, the mean mapping rate of  
547 the included samples was 96.7% and mean number of genes detected was 21078.  
548 For the TCGA cohort, publicly available data was downloaded for mutation data  
549 (<https://gdc.cancer.gov/about-data/publications/mc3-2017>), CNA data  
550 (<https://www.cbioportal.org/datasets>), upper-quartile (UQ) normalized transcripts-per-  
551 million (TPM) RNA-seq data (<https://www.cbioportal.org/datasets>), and clinical data  
552 (<https://www.cbioportal.org/datasets>)<sup>50,51</sup>. The dataset from the study by Malouf et  
553 al.<sup>19</sup> of paired sequencing of sarcomatoid RCC was downloaded from  
554 <https://www.nature.com/articles/s41598-020-57534-5#Sec16> (supplementary dataset  
555 1). The dataset from the TRACERx Renal study<sup>18</sup> was downloaded from  
556 <https://www.ncbi.nlm.nih.gov/pmc/articles/PMC5938372/> (Tables S1 and S2).  
557 For the OncoPanel cohort, DNA extraction and sequencing were performed as  
558 previously described for the OncoPanel gene panel assay<sup>52</sup>. The OncoPanel assay  
559 is an institutional analytic platform that is certified for clinical use and patient  
560 reporting under the Clinical Laboratory Improvement Amendments (CLIA) Act. The  
561 panel includes 275 to 447 cancer genes (versions 1 to 3 of the panel), including 239



562 genes that are common across all 3 versions of the panel. Mean sample-level  
563 coverage for the Oncopanel cohort was 305x.

564 For the 15 cell lines acquired by our laboratory, RNA-seq was done using Illumina  
565 Platform PE150 polyadenylated non-stranded sequencing. The average mapping  
566 rate was 98.9% and 17998 genes were detected on average (all RNA-seqQC2  
567 quality control metrics are reported in Table S11).

568 RNA-seq data (which were UQ normalized to an upper quartile of 1000 and log2-  
569 transformed) for 20 kidney cancer cell lines with RNA-seq and drug sensitivity data  
570 were downloaded from The Cancer Dependency Map Portal (DepMap)<sup>53</sup>  
571 (<https://depmap.org/portal/download/>) and drug sensitivity data were downloaded  
572 from the Cancer Therapeutics Response Portal (CTRP v2)<sup>46</sup>  
573 (<https://portals.broadinstitute.org/ctrp/?cluster=true?page=#ctd2Cluster>) and the  
574 PRISM 19Q4 secondary screen (<https://depmap.org/portal/download/>) as areas  
575 under the curve (AUC) for all agents.

## 576 **Genomic Analysis**

577 The analytical pipeline for the WES data for the CheckMate 010 and 025 trials is  
578 described in detail in a separate paper (Braun et al., *Nature Medicine*, in press).

579 Briefly, paired-end Illumina reads were aligned to the hg19 human genome reference  
580 using the Picard pipeline  
581 ([https://software.broadinstitute.org/gatk/documentation/tooldocs/4.0.1.0/  
582 picard\\_fingerprint\\_CrosscheckFingerprints.php](https://software.broadinstitute.org/gatk/documentation/tooldocs/4.0.1.0/picard_fingerprint_CrosscheckFingerprints.php)). Cross-sample contamination were  
583 assessed with the ContEst tool<sup>54</sup>, and samples with  $\geq 5\%$  contamination were  
584 excluded. Point mutations and indels were identified using MuTect<sup>55</sup> and Strelka<sup>56</sup>,  
585 respectively. Possible artifacts due to orientation bias, germline variants, sequencing  
586 and poor mapping were filtered using a variety of tools including Orientation Bias



587 Filter<sup>57</sup>, MAFPoNFilter<sup>58</sup>, and RealignmentFilter. Copy number events were called  
588 and filtered using GATK4 ModelSegments<sup>59</sup>. Copy number panel-of-normals was  
589 created based on matched germline samples. GISTIC<sup>60</sup> was used to determine  
590 gene-level copy number alteration events. Clonality assessment was performed  
591 using ABSOLUTE<sup>61</sup>. Mutations were considered clonal if the expected cancer cell  
592 fraction (CCF) of the mutation as estimated by ABSOLUTE was 1, or if the estimated  
593 probability of the mutation being clonal was greater than 0.5. The intratumor  
594 heterogeneity index (ITH) was defined as the ratio of subclonal mutations to clonal  
595 mutations.

596 OncoPanel mutation and gene-level copy number calling was performed as  
597 previously described<sup>52</sup>. In particular, variants were filtered to exclude those that  
598 occurred at a frequency of >0.1% in the Exome Sequencing Project database  
599 (<http://evs.gs.washington.edu/EVS/>) in order to remove variants that were probably  
600 germline variants. Additionally, in order to further remove potential germline variants  
601 from the OncoPanel results, Ensembl Variant Effect Predictor (VEP)<sup>62</sup> was run on  
602 the OncoPanel mutations and mutations present at an allelic frequency of 0.5% in  
603 one of the superpopulations were excluded from all downstream analyses.

604 For the purposes of the present genomic analysis, mutation and CNA of 244 genes  
605 were analyzed (Table S13), including the 239 genes that are common across the 3  
606 versions of the panel, 3 frequently mutated genes in RCC (*KDM5C*, *KMT2D*, and  
607 *PBRM1*)<sup>16</sup> that are only included in versions 2 and 3 of the panel, and 2 genes that  
608 are included in none of the 3 versions of the panel, including a frequently mutated  
609 RCC gene (*KMT2C*)<sup>16</sup> and a gene that has been previously suggested to be more  
610 frequently mutated in sarcomatoid RCC (*RELN*)<sup>15</sup>. All mutations from TCGA,  
611 OncoPanel, and CheckMate cohorts were annotated using Oncotator<sup>63</sup>

612 (<https://software.broadinstitute.org/cancer/cga/oncotator>). For WES data, only  
613 mutations with more than 30x coverage were included.

614 Somatic genomic alterations (mutations and insertions-deletions [indels]) were  
615 considered to be pathogenic if they were truncating (nonsense or splice site), indels,  
616 or missense mutations that were predicted to be pathogenic by Polyphen-2 HumDiv  
617 score<sup>64</sup>  $\geq 0.957$  or Mutation Assessor<sup>65</sup> score  $> 1.90$ . Tumor mutational burden was  
618 calculated as the sum of all non-synonymous mutations divided by the estimated bait  
619 set (30 Megabases [Mb] for WES, 1.32 Mb for panel v3, 0.83 Mb for panel v2, and  
620 0.76 Mb for panel v1). Moreover, the indel burden (either all indels or only frameshift  
621 indels) was normalized by dividing by the estimated bait set for each version of  
622 OncoPanel. Gene-level deep deletions and high amplifications were considered for  
623 the primary copy number analysis, while any deletions (one-copy or two-copy) and  
624 any amplifications (low or high) were analyzed as a supplementary analysis.

625 The co-mutation plot was generated excluding patients that had either mutation or  
626 CNA data missing in any of the 3 cohorts (as reported in Table S1). The estimate of  
627 percentage mutated took into account the missing genes for patients sequenced by  
628 panel sequencing (these percentages were estimated while excluding patients  
629 sequenced by panel sequencing for *RELN* and *KMT2C*, while only the patients  
630 sequenced by panel v1 were excluded for *KDM5C*, *KMT2D*, and *PBRM1*). TMB was  
631 compared between S/R and non-S/R in each of the three cohorts independently  
632 using Mann-Whitney U tests. Genomic alterations (mutations and indels, deep  
633 deletions, and high amplifications analyzed separately) were compared between S/R  
634 and non-S/R in each of the three cohorts independently using a Fisher's exact test.  
635 For the OncoPanel cohort, for *KDM5C*, *KMT2D*, and *PBRM1*, patients that had been  
636 sequenced by panel version 1 were excluded from the analysis. Only genes that

637 were altered in at least 5% of patients (in all patients with RCC or in the S/R RCC  
638 group) in at least one of the 3 cohorts were tested. The p-values from the 3 cohorts  
639 were subsequently combined using Fisher's method for meta-analyses. The  
640 combined p-values were corrected for multiple hypothesis testing using Benjamini-  
641 Hochberg correction. Findings were considered to be significant if they were  
642 statistically significant at  $q < 0.05$  and the same direction of the effect was observed in  
643 at least two of the three included datasets.

644 For the analysis of paired data in the dataset by Malouf et al. (paired sarcomatoid  
645 and epithelioid regions of S RCC tumors), continuous variables were compared by  
646 the paired Wilcoxon signed rank test. Mutation rates in genes were compared using  
647 McNemar's test.

#### 648 **Transcriptomic Analysis**

649 RNA-seq data from the CheckMate cohorts and the 15 cell lines sequenced in our  
650 laboratory were aligned using STAR<sup>66</sup>, quantified using RSEM<sup>67</sup>, and evaluated for  
651 quality using RNA-seqQC2<sup>68</sup>. Samples were excluded if they had an interquartile  
652 range of  $\log_2(\text{TPM}+1) < 0.5$  or had less than 15,000 genes detected. Additionally,  
653 since the CheckMate cohort had been sequenced by a stranded protocol, samples  
654 were filtered if they had an End 2 Sense Rate  $< 0.90$  or End 1 Sense Rate  $> 0.10$  (as  
655 defined by RNA-seqQC2). For samples where RNA-seq was performed in  
656 duplicates, the run with a higher interquartile range of  $\log_2(\text{TPM}+1)$ , considered a  
657 surrogate for better quality data, was used. We subsequently filtered genes that were  
658 not expressed in any of the samples (in each cohort independently) then UQ-  
659 normalized the TPMs to an upper quartile of 1000, and  $\log_2$ -transformed them. Since  
660 the CheckMate cohort had been sequenced in 4 separate batches, principal

661 component analysis (PCA) was used to evaluate for batch effects and 4 batches  
662 were observed. These 4 batches were corrected for using ComBat<sup>69</sup> (Fig. S15).  
663 Subsequently, a PCA was performed on the ComBat-corrected expression matrix to  
664 confirm that batch effects had been adequately corrected for (Fig. S15). Moreover, a  
665 constant that was equal to the first integer above the minimum negative expression  
666 value obtained post-ComBat (constant of +21) was added to eliminate negative gene  
667 expression values that were a by-product of ComBat correction. The ComBat-  
668 corrected expression matrix was used for all downstream analyses on the  
669 CheckMate cohort. All downstream analyses were computed on the TCGA and  
670 CheckMate cohorts independently and only results which were found to be  
671 independently statistically significant in each of the two cohorts were considered to  
672 be significant.

673 GSEA between S/R and non-S/R was run using the Java Application for GSEA  
674 v4.0.0 and MSigDB 7.0<sup>70</sup> on the 50 “Hallmark” gene sets, *MYC* v1 and v2 “Founder”  
675 gene sets, and select KEGG<sup>25</sup> and REACTOME<sup>24</sup> antigen presentation machinery  
676 gene sets. Gene sets were considered to be enriched if  $q < 0.25$ . Single sample  
677 GSEA (ssGSEA) was additionally computed using the “GSVA” package<sup>71</sup> in the R  
678 programming environment to obtain sample-level GSEA scores. Differential gene  
679 expression analysis was computed using the non-parametric Mann-Whitney U test  
680 and Benjamini-Hochberg false discovery rate correction with  $q < 0.05$  considered  
681 statistically significant. The CIBERSORTx deconvolution algorithm<sup>72</sup> was used to  
682 infer immune cell infiltration from RNA-seq data (Job type: “Impute cell fractions”), in  
683 absolute mode, on the LM22 signature<sup>73</sup>, with B mode batch correction (in order to  
684 correct for the batch effect between the LM22 signature, which was derived from  
685 microarray data, and the data used in this study which consisted of RNA-seq), with

686 quantile normalization disabled, and in 1000 permutations. All samples which had a  
687 p-value for deconvolution  $>0.05$  were considered to have failed deconvolution and  
688 were therefore discarded from all downstream analyses. Relative cell proportions  
689 were obtained by normalizing the CIBERSORTx output to the sample-level sum of  
690 cell counts (in order to obtain percentages of immune infiltration). A constant of  $10^6$   
691 was added to all proportions in order to allow the computation of immune cell  
692 ratios. Additionally, Th1, Th2, and Th17 scores were computed using ssGSEA (and  
693 were normalized to scores between 0 and 100) based on previously described  
694 signatures for these cell types<sup>30</sup>. All immune cell proportions and ratios were  
695 compared between S/R and non-S/R using a non-parametric Mann-Whitney U test  
696 with Benjamini-Hochberg correction and a q-value threshold of 0.05 for statistical  
697 significance.

698 In order to evaluate whether specific signatures predicted outcomes in S/R RCC,  
699 Cox regression models were performed to evaluate the relationship between  
700 ssGSEA scores, modeled as continuous variables (multiplied by a factor of 100), and  
701 survival outcomes. ssGSEA scores found to be significantly associated with survival  
702 outcomes were used to dichotomize S/R RCC patients into two groups at the median  
703 of the score. The dichotomized groups were evaluated using Kaplan-Meier curves  
704 and compared using log-rank tests. In order to evaluate whether such relationships  
705 held in patients with non-S/R RCC, the same analysis was conducted in non-S/R  
706 RCC using the ssGSEA scores that were found to be related to outcomes in S/R  
707 RCC. In addition, for non-S/R RCC patients, the group was also dichotomized based  
708 on the median of the S/R RCC group and compared by Kaplan-Meier methodology  
709 and log-rank tests. In particular, this was done for MYC v1 scores which were found  
710 to be significantly related to outcomes in the S/R RCC group and not found to be

711 related to outcomes when evaluated continuously in the non-S/R RCC group or  
712 when dichotomized at the median.

### 713 **Cell Line In Silico Drug Sensitivity Analysis**

714 In order to evaluate potential novel therapeutic targets for S/R RCC, we computed  
715 ssGSEA scores for the 20 kidney cancer cell lines in DepMap that also had drug  
716 sensitivity data reported as areas under the curve (AUCs) of the dose-response  
717 curve in CTRP v2 and in the PRISM secondary screen. Using the gene signatures  
718 that were found to be significantly upregulated in both bulk tumor RNA-seq cohorts  
719 (in the TCGA and CheckMate cohorts independently) and sarcomatoid cell lines, we  
720 correlated the scores to drug sensitivity AUC data using Pearson's  $r$  correlation  
721 coefficients. Only therapeutic agents that were tested in at least 8 of the 20 kidney  
722 cancer cell lines were evaluated in CTRP v2. For visualization, the ssGSEA-AUC  
723 correlations were grouped by drug types and illustrated in a heatmap (in which  
724 negative correlations indicated that higher ssGSEA scores correlated with lower  
725 AUCs and therefore greater sensitivity). Moreover, scatter plots of the correlations  
726 were displayed for key correlations.

### 727 **Immunohistochemistry and Immunofluorescence**

728 PD-L1 expression on the membrane of tumor cells was assessed using the Dako  
729 assay, as previously described in the CheckMate 025 and 010 trials<sup>26,27</sup>. Tumors  
730 were considered PD-L1 positive if they expressed PD-L1 on  $\geq 1\%$  of tumor cells.  
731 The immunofluorescence assay used is described in detail in a separate paper  
732 (Braun et al., *Nature Medicine*, in press). CD8 immunostain was performed as part of  
733 a multiplex fluorescent IHC panel on 4  $\mu\text{m}$  FFPE sections. Tumor sections were  
734 stained using the Opal multiplex IHC system (PerkinElmer), which is based on

735 tyramide-conjugated fluorophores. All slides were counterstained with Spectral DAPI  
736 (PerkinElmer) and manually coverslipped. The slides were imaged using the Vectra  
737 3 automated quantitative pathology imaging system (PerkinElmer) and whole slide  
738 multispectral images were acquired at 10x magnification.

739 Digital whole slide multispectral images were then uploaded into HALO Image  
740 Analysis platform version 2.1.1637.18 (Indica Labs). For each case, the tumor  
741 margin and center were defined while also excluding empty spaces, necrosis, red  
742 blood cells and fibrotic septa. Specifically, the tumor margin was defined as the  
743 space within 500  $\mu\text{m}$  (in either direction) of the interface between the tumor and  
744 surrounding tissue. Image analysis algorithms were built using Indica Labs High-Plex  
745 FL v2.0 module to measure the area within each layer, perform DAPI-based nuclear  
746 segmentation and detect CD8 (FITC)-positive cells by setting a dye cytoplasm  
747 positive threshold. A unique algorithm was created for each tumor and its accuracy  
748 was validated through visual inspection by at least one pathologist.

## 749 **Clinical Outcomes**

750 For patients in the Harvard and IMDC cohorts, clinical data were retrospectively  
751 collected. OS was defined as the time from the start of the line of therapy (ICI or non-  
752 ICI) until death from any cause. Time to treatment failure (TTF) was defined as the  
753 time from start of the line of therapy until discontinuation of therapy for any cause.  
754 Since assessment of responses in these retrospective cohorts was not subject to  
755 radiological review specifically for the purpose of this study, responses were defined  
756 based on RECIST v1.1 criteria<sup>74</sup> as available by retrospective review. For the  
757 CheckMate cohort, OS was defined from the time of randomization until death from  
758 any cause. Progression free survival (PFS) was defined from randomization until



759 death or progression. Both PFS and ORR were defined using RECIST v1.1 criteria.  
760 All patients who were lost to follow-up or did not have an event at last follow-up were  
761 censored.

## 762 **Statistical Analysis**

763 The dose-response curves for the in vitro cell viability assays performed at DFCI  
764 were generated using GraphPad PRISM 8. All analyses were done in the R  
765 programming environment version 3.6.1. For boxplots, the upper and lower hinges  
766 represent the 75<sup>th</sup> and 25<sup>th</sup> percentiles, respectively. The whiskers extend in both  
767 directions until the largest or lowest value not further than 1.5 times the interquartile  
768 range from the corresponding hinge. Outliers (beyond 1.5 times the interquartile  
769 range) are plotted individually. Continuous variables were summarized by their  
770 means and standard deviations (SD) or medians and interquartile ranges (IQR) or  
771 ranges. Categorical variables (such as gene alterations) were summarized by their  
772 percentages. For survival outcomes, the Kaplan-Meier methodology was used to  
773 summarize survival distributions in different groups; 18-month PFS (or TTF) and 2-  
774 year OS were provided with 95% confidence intervals. For survival outcomes,  
775 multivariable Cox regression models were used for the comparison of ICI and non-  
776 ICI regimens and adjusted hazard ratios (HR) with their 95% confidence intervals  
777 were reported. Specifically, the IMDC risk groups<sup>75</sup> (Poor vs.  
778 Intermediate/Favourable), line of therapy (2nd line and beyond vs. 1st line), and  
779 background histology (clear cell vs. non-clear cell) were adjusted for in the Harvard  
780 and IMDC cohort analyses and the Memorial Sloan Kettering Cancer Center  
781 (MSKCC) risk groups<sup>76</sup> (Poor vs. Intermediate vs. Favourable) were adjusted for in  
782 the CheckMate cohort analysis. Similarly, the ORR was compared between the ICI  
783 and non-ICI using multivariable logistic regression models adjusting for the same



784 covariates (except for the CheckMate cohort, in which only one patient had had a  
785 response in the everolimus arm and therefore the adjusted odds ratio was not  
786 estimable). For all multivariable analyses, patients with missing data in any of the  
787 variables were excluded from the analysis. For ORR analyses, only patients who  
788 were evaluable for response were included in the analysis. The Kaplan-Meier  
789 methodology for assessing point estimates of survival was computed using the  
790 “landest” package in R. All heatmaps were created using the R package “pheatmap”  
791 and were computed based on Z score transformations. When multiple cohorts were  
792 represented in the same heatmap, the Z score normalization was done within each  
793 cohort separately (in order to account for batch effects in visualization). All tests were  
794 two-tailed and considered statistically significant for  $p < 0.05$  or  $q < 0.05$  unless  
795 otherwise specified.

796 **Data Availability:** All relevant correlative data are available from the authors and/or  
797 are included with the manuscript. All clinical and correlative data from the  
798 CheckMate 010 and 025 clinical trials are made separately available as part of the  
799 accompanying paper (Braun et al., *Nature Medicine*, in press). All intermediate data  
800 from the RNA-seq analyses of the CheckMate and TCGA cohorts are made  
801 available in tables S6 (single sample gene set enrichment analysis scores) and S9  
802 (CIBERSORTx immune deconvolution). The raw, transformed, and intermediate data  
803 from the generated cell line RNA-seq data are made available in Table S11. Any  
804 other queries about the data used in this study should be directed to the  
805 corresponding authors of this study.

806 **Code Availability:** Algorithms used for data analysis are all publicly available from  
807 the indicated references in the Methods section. Any other queries about the custom  
808 code used in this study should be directed to the corresponding authors of this study.

809

## 810 **Acknowledgements**

811 We thank the OncoPanel study team and the patients who contributed their data to  
812 research and participated in clinical trials. We thank all contributors to The  
813 International Metastatic Renal-Cell Carcinoma Database Consortium for their data  
814 contributions. We thank Dr. Kanishka Sircar and Dr. Jose Antonio Karam for  
815 providing us with additional data and insights from their previously published study.  
816 This work was supported in part by Dana-Farber / Harvard Cancer Center Kidney  
817 Cancer SPORE (P50-CA101942-12), DOD CDMRP (W81XWH-18-1-0480), and  
818 Bristol-Myers Squibb. S.A.S acknowledges support by the NCI (R50RCA211482).

819 RF has been funded in part by the ARC foundation grant. XXW has been funded in  
820 part by the KCA YIA. CJW is supported in part by The G. Harold and Leila Y.  
821 Mathers Foundation, and she is a Scholar of the Leukemia and Lymphoma Society.  
822 T.H.H is supported by National Cancer Institute (R01 CA224917). E.M.V is  
823 supported by NIH R01 CA227388. T.K.C. is supported in part by the Dana-  
824 Farber/Harvard Cancer Center Kidney SPORE and Program, the Kohlberg Chair at  
825 Harvard Medical School and the Trust Family, Michael Brigham, and Loker Pinard  
826 Funds for Kidney Cancer Research at DFCl.

827

## 828 **Author Contributions**

829 Conception and Design: Ziad Bakouny, David A. Braun, Eliezer M. Van Allen, Toni  
830 K. Choueiri

831 Provision of study material or patients: Ziad Bakouny, Wenting Pan, Gwo-Shu Mary  
832 Lee, Stephen Tang, Kevin Bi, Jihye Park, Sabrina Camp, Maura Sticco-Ivins, Laure  
833 Hirsch, Giannicola Genovese, Michelle S. Hirsch, Srinivas Raghavan Viswanathan,  
834 Steven L. Chang, Xiao X. Wei, Bradley A. McGregor, Lauren C. Harshman, Leigh  
835 Ellis, Mark Pomerantz, Matthew L. Freedman, Michael B. Atkins, Catherine J. Wu,  
836 Thai H. Ho, W. Marston Linehan, David F. McDermott, Daniel Y.C. Heng, Sabina  
837 Signoretti, Eliezer M. Van Allen, and Toni K. Choueiri

838 Collection and assembly of data: Ziad Bakouny, Stephen Tang, Srinivas Raghavan  
839 Viswanathan, Xin Gao, Abdallah Flaifel, Amin H. Nassar, Sarah Abou Alaiwi, Megan  
840 Wind-Rotolo, Petra Ross-Macdonald, Ronan Flippot, Gabrielle Bouchard, John A.  
841 Steinharter, Pier Vitale Nuzzo, Miriam Ficial, Miriam Sant'Angelo, Jacob E.  
842 Berchuck, Shaan Dudani

843 Data Analysis and Interpretation: Ziad Bakouny, Stephen Tang, Srinivas Raghavan  
844 Viswanathan, David A. Braun, Sachet A. Shukla, Yue Hou, Wanling Xie, Megan  
845 Wind-Rotolo, Petra Ross-Macdonald, Alice Bosma-Moody, Meng Xiao He, Natalie  
846 Vokes, Jackson Nyman, Juliet Forman, Maxine Sun, Eliezer M. Van Allen, Toni K.  
847 Choueiri

848 Manuscript writing and revision: All authors

849 Final approval of manuscript: All authors

850 Accountable for all aspects of work: All authors

851

## 852 **Competing Interests statement**

853 ZB: reported nonfinancial support from Bristol-Myers Squibb and Genentech/ImCore.

854 D.A.B. reported nonfinancial support from, Bristol-Myers Squibb, and personal fees  
855 from Octane Global, Defined Health, Dedham Group, Adept Field Solutions,  
856 Slingshot Insights, Blueprint Partnerships, Charles River Associates, Trinity Group,  
857 and Insight Strategy, outside of the submitted work.

858 S.A.S. reported nonfinancial support from Bristol-Myers Squibb, and equity in 152  
859 Therapeutics outside the submitted work.

- 860 X.G: Research Support to Institution: Exelixis.
- 861 X.X.W: Research Support: BMS.
- 862 B.A.M is a consultant for Bayer, Astellas, Astra Zeneca, Seattle Genetics, Exelixis,  
863 Nektar, Pfizer, Janssen, Genentech and EMD Serono. He received research  
864 support to Dana Farber Cancer Institute (DFCI) from Bristol Myers Squibb, Calithera,  
865 Exelixis, Seattle Genetics.
- 866 L.C.H reports consulting fees from Genentech, Dendreon, Pfizer,  
867 Medivation/Astellas, Exelixis, Bayer, Kew Group, Corvus, Merck, Novartis, Michael J  
868 Hennessy Associates (Healthcare Communications Company and several brands  
869 such as OncLive and PER), Jounce, EMD Serrano, and Ology Medical Education;  
870 Research funding from Bayer, Sotio, Bristol-Myers Squibb, Merck, Takeda,  
871 Dendreon/Valient, Janssen, Medivation/Astellas, Genentech, Pfizer, Endocyte  
872 (Novartis), and support for research travel from Bayer and Genentech.
- 873 M.B.A: Advisory Board participation: BMS, Merck, Novartis, Arrowhead, Pfizer,  
874 Galactone, Werewolf, Fathom, Pneuma, Leads BioPharma; Consultant: BMS,  
875 Merck, Novartis, Pfizer, Genentech-Roche, Exelixis, Eisai, Aveo, Array,  
876 AstraZeneca, Ideera, Aduro, ImmunoCore, Boehringer-Ingelheim, Iovance, Newlink,  
877 Pharma, Surface, Alexion, Acceleron, Cota, Amgen; Research Support to institution:  
878 BMS, Merck, Pfizer, Genentech.
- 879 C.J.W: Co-founder of Neon Therapeutics, and is a member of its SAB. Receives  
880 research funding from Pharmacyclics.
- 881 T.H.H: Advisory board participation: Surface Therapeutics, Exelixis, Genentech,  
882 Pfizer, Ipsen, Cardinal Health; research support-Novartis.
- 883 D.F.M reports a consulting/advisory role for Bristol-Myers Squibb, Merck,  
884 Roche/Genentech, Pfizer, Exelixis, Novartis, Eisai, X4 Pharmaceuticals, and Array  
885 BioPharma; and reports that his home institution receives research funding from  
886 Prometheus Laboratories.
- 887 D.H: consulting or research funding from Pfizer, Novartis, BMS, Ipsen, Exelixis, and  
888 Merck.
- 889 S.S: Research support to Institution: Bristol-Myers Squibb, AstraZeneca, Novartis,  
890 Exelixis; Consultant: Merck, AstraZeneca, Bristol-Myers Squibb, AACR, and NCI;  
891 royalties: Biogenex.
- 892 E.M.V: Advisory/Consulting: Tango Therapeutics, Genome Medical, Invitae, Illumina,  
893 Ervaxx; Research support: Novartis, BMS; Equity: Tango Therapeutics, Genome  
894 Medical, Syapse, Ervaxx, Microsoft; Travel reimbursement: Roche/Genentech;  
895 Patents: Institutional patents filed on ERCC2 mutations and chemotherapy response,  
896 chromatin mutations and immunotherapy response, and methods for clinical  
897 interpretation.
- 898 T.K.C: Research (Institutional and personal): AstraZeneca, Alexion, Bayer, Bristol  
899 Myers-Squibb/ER Squibb and sons LLC, Cerulean, Eisai, Foundation Medicine Inc.,

900 Exelixis, Ipsen, Tracon, Genentech, Roche, Roche Products Limited, F. Hoffmann-  
901 La Roche, GlaxoSmithKline, Lilly, Merck, Novartis, Peloton, Pfizer, Prometheus  
902 Labs, Corvus, Calithera, Analysis Group, Sanofi/Aventis, Takeda, National Cancer  
903 Institute (NCI), National Institute of Health (NIH), Department of Defense (DOD).;   
904 Honoraria: AstraZeneca, Alexion, Sanofi/Aventis, Bayer, Bristol Myers-Squibb/ER  
905 Squibb and sons LLC, Cerulean, Eisai, Foundation Medicine Inc., Exelixis,  
906 Genentech, Roche, Roche Products Limited, F. Hoffmann-La Roche,  
907 GlaxoSmithKline, Merck, Novartis, Peloton, Pfizer, EMD Serono, Prometheus Labs,  
908 Corvus, Ipsen, Up-to-Date, NCCN, Analysis Group, NCCN, Michael J. Hennessy  
909 (MJH) Associates, Inc (Healthcare Communications Company with several brands  
910 such as OnClive, PeerView and PER), Research to Practice, L-path, Kidney Cancer  
911 Journal, Clinical Care Options, Platform Q, Navinata Healthcare, Harborside Press,  
912 American Society of Medical Oncology, NEJM, Lancet Oncology, Heron  
913 Therapeutics, Lilly, ASCO, ESMO ; Consulting or Advisory Role: AstraZeneca,  
914 Alexion, Sanofi/Aventis, Bayer, Bristol Myers-Squibb/ER Squibb and sons LLC,  
915 Cerulean, Eisai, Foundation Medicine Inc., Exelixis, Genentech, Heron Therapeutics,  
916 Lilly, Roche, GlaxoSmithKline, Merck, Novartis, Peloton, Pfizer, EMD Serono,  
917 Prometheus Labs, Corvus, Ipsen, Up-to-Date, NCCN, Analysis Group, Pionyr,  
918 Tempest.; No speaker's bureau; Stock ownership: Pionyr, Tempest.; No leadership  
919 or employment in for-profit companies. Other present or past leadership roles:  
920 Director of GU Oncology Division at Dana-Farber and past President of medical Staff  
921 at Dana-Farber), member of NCCN Kidney panel and the GU Steering Committee,  
922 past chairman of the Kidney Cancer Association Medical and Scientific Steering  
923 Committee); Patents, royalties or other intellectual properties: International Patent  
924 Application No. PCT/US2018/12209, entitled "PBRM1 Biomarkers Predictive of Anti-  
925 Immune Checkpoint Response," filed January 3, 2018, claiming priority to U.S.  
926 Provisional Patent Application No. 62/445,094, filed January 11, 2017 and  
927 International Patent Application No. PCT/US2018/058430, entitled "Biomarkers of  
928 Clinical Response and Benefit to Immune Checkpoint Inhibitor Therapy," filed  
929 October 31, 2018, claiming priority to U.S. Provisional Patent Application No.  
930 62/581,175, filed November 3, 2017; Travel, accommodations, expenses, in relation  
931 to consulting, advisory roles, or honoraria; Medical writing and editorial assistance  
932 support may have been funded by Communications companies funded by  
933 pharmaceutical companies (ClinicalThinking, Envision Pharma Group, Fishawack  
934 Group of Companies, Health Interactions, Parexel, Oxford PharmaGenesis, and  
935 others); The institution (Dana-Farber Cancer Institute) may have received additional  
936 independent funding of drug companies or/and royalties potentially involved in  
937 research around the subject matter; CV provided upon request for scope of clinical  
938 practice and research; Mentored several non-US citizens on research projects with  
939 potential funding (in part) from non-US sources/Foreign Components: Asmar Wood  
940 S.A.L. is a private company based in Beirut, Lebanon that will provide a total of  
941 \$100,000 in salary support to Dr. Sarah Abou Alaiwi from 7/1/2018 to 7/1/2020  
942 during her post-doctoral research fellowship at DFCI; Fondation Arc Pour La  
943 Recherche Sur Le Cancer is a not-for-profit foundation based in Villejuif, France that  
944 provides 2561.04€ per month in salary support to Dr. Ronan Flippot during his  
945 clinical training at DFCI from 5/2/2018 to 11/4/2018.

946 The other authors declare no potential conflicts of interest.

947 **References**

- 948 1. Hanif, A. *et al.* Metastatic sarcomatoid renal cell carcinoma treated with  
949 immune checkpoint inhibitors. *Oncoimmunology* **8**, 1–4 (2019).
- 950 2. Gupta, S. *et al.* JAK2/PD-L1/PD-L2 (9p24.1) amplifications in renal cell  
951 carcinomas with sarcomatoid transformation: implications for clinical  
952 management. *Mod. Pathol.* **2**, (2019).
- 953 3. Chahoud, J. *et al.* Nivolumab for the Treatment of Patients with Metastatic  
954 Non-Clear Cell Renal Cell Carcinoma (nccRCC): A Single-Institutional  
955 Experience and Literature Meta-Analysis. *Oncologist* theoncologist.2019-0372  
956 (2019). doi:10.1634/theoncologist.2019-0372
- 957 4. Przybycin, C. G. *et al.* Rhabdoid Differentiation Is Associated With Aggressive  
958 Behavior in Renal Cell Carcinoma. *Am. J. Surg. Pathol.* **38**, 1 (2014).
- 959 5. Kyriakopoulos, C. E. *et al.* Outcome of patients with metastatic sarcomatoid  
960 renal cell carcinoma: Results from the international metastatic renal cell  
961 carcinoma database consortium. *Clin. Genitourin. Cancer* **13**, e79–e85 (2015).
- 962 6. Delahunt, B. *et al.* The International Society of Urological Pathology (ISUP)  
963 Grading System for Renal Cell Carcinoma and Other Prognostic Parameters  
964 The Members of the ISUP Renal Tumor Panel. *Am J Surg Pathol* **37**, 1490–  
965 1504 (2013).
- 966 7. de Peralta-Venturina, M. *et al.* Sarcomatoid Differentiation in Renal Cell  
967 Carcinoma. *Am. J. Surg. Pathol.* **25**, 275–284 (2001).
- 968 8. McDermott, D. F. *et al.* CheckMate 214 post-hoc analyses of nivolumab plus  
969 ipilimumab or sunitinib in IMDC intermediate/poor-risk patients with previously



- 970 untreated advanced renal cell carcinoma with sarcomatoid features. *J. Clin.*  
971 *Oncol.* **37**, 4513–4513 (2019).
- 972 9. Choueiri, T. K. *et al.* 910PDEfficacy and biomarker analysis of patients (pts)  
973 with advanced renal cell carcinoma (aRCC) with sarcomatoid histology  
974 (sRCC): Subgroup analysis from the phase III JAVELIN renal 101 trial of first-  
975 line avelumab plus axitinib (A + Ax) vs sunitinib (S). *Ann. Oncol.* **30**, (2019).
- 976 10. Rini, B. I. *et al.* Atezolizumab (atezo) + bevacizumab (bev) versus sunitinib  
977 (sun) in pts with untreated metastatic renal cell carcinoma (mRCC) and  
978 sarcomatoid (sarc) histology: IMmotion151 subgroup analysis. *J. Clin. Oncol.*  
979 **37**, 4512–4512 (2019).
- 980 11. Rini, B. I. *et al.* Pembrolizumab (pembro) plus axitinib (axi) versus sunitinib as  
981 first-line therapy for metastatic renal cell carcinoma (mRCC): Outcomes in the  
982 combined IMDC intermediate/poor risk and sarcomatoid subgroups of the  
983 phase 3 KEYNOTE-426 study. *J. Clin. Oncol.* **37**, 4500–4500 (2019).
- 984 12. Peña-Llopis, S. *et al.* BAP1 loss defines a new class of renal cell carcinoma.  
985 *Nat. Genet.* **44**, 751–9 (2012).
- 986 13. Malouf, G. G. *et al.* Genomic Characterization of Renal Cell Carcinoma with  
987 Sarcomatoid Dedifferentiation Pinpoints Recurrent Genomic Alterations. *Eur.*  
988 *Urol.* **70**, 348–357 (2016).
- 989 14. Bi, M. *et al.* Genomic characterization of sarcomatoid transformation in clear  
990 cell renal cell carcinoma. *Proc. Natl. Acad. Sci. U. S. A.* **113**, 2170–5 (2016).
- 991 15. Wang, Z. *et al.* Sarcomatoid renal cell carcinoma has a distinct molecular  
992 pathogenesis, driver mutation profile, and transcriptional landscape. *Clin.*

- 993 *Cancer Res.* **23**, 6686–6696 (2017).
- 994 16. Chen, F. *et al.* Multilevel Genomics-Based Taxonomy of Renal Cell  
995 Carcinoma. *Cell Rep.* **14**, 2476–2489 (2016).
- 996 17. Goodman, A. M. *et al.* Prevalence of PDL1 amplification and preliminary  
997 response to immune checkpoint blockade in solid tumors. *JAMA Oncol.* **4**,  
998 1237–1244 (2018).
- 999 18. Turajlic, S. *et al.* Deterministic Evolutionary Trajectories Influence Primary  
1000 Tumor Growth: TRACERx Renal. *Cell* **173**, 595-610.e11 (2018).
- 1001 19. Malouf, G. G. *et al.* Molecular characterization of sarcomatoid clear cell renal  
1002 cell carcinoma unveils new candidate oncogenic drivers. *Sci. Rep.* **10**, 1–10  
1003 (2020).
- 1004 20. Subramanian, A. *et al.* Gene set enrichment analysis: A knowledge-based  
1005 approach for interpreting genome-wide expression profiles. *Proc. Natl. Acad.*  
1006 *Sci. U. S. A.* **102**, 15545–15550 (2005).
- 1007 21. Hänzelmann, S., Castelo, R. & Guinney, J. GSVA: Gene set variation analysis  
1008 for microarray and RNA-Seq data. *BMC Bioinformatics* **14**, (2013).
- 1009 22. Gross, S. R. Actin binding proteins: their ups and downs in metastatic life. *Cell*  
1010 *Adh. Migr.* **7**, 199–213 (2013).
- 1011 23. Wang, S., He, Z., Wang, X., Li, H. & Liu, X. S. Antigen presentation and tumor  
1012 immunogenicity in cancer immunotherapy response prediction. *Elife* **8**, (2019).
- 1013 24. Jassal, B. *et al.* The reactome pathway knowledgebase. *Nucleic Acids Res.*  
1014 **48**, (2020).

- 1015 25. Kanehisa, M. & Goto, S. *KEGG: Kyoto Encyclopedia of Genes and Genomes*.  
1016 *Nucleic Acids Research* **28**, (2000).
- 1017 26. Motzer, R. J. *et al.* Nivolumab for Metastatic Renal Cell Carcinoma: Results of  
1018 a Randomized Phase II Trial. *J. Clin. Oncol.* **33**, 1430–1437 (2015).
- 1019 27. Motzer, R. J. *et al.* Nivolumab versus Everolimus in Advanced Renal-Cell  
1020 Carcinoma. *N. Engl. J. Med.* **373**, 1803–1813 (2015).
- 1021 28. Karachaliou, N. *et al.* Interferon gamma, an important marker of response to  
1022 immune checkpoint blockade in non-small cell lung cancer and melanoma  
1023 patients. *Ther. Adv. Med. Oncol.* **10**, (2018).
- 1024 29. Mo, X. *et al.* Interferon- $\gamma$  signaling in melanocytes and melanoma cells  
1025 regulates expression of CTLA-4. *Cancer Res.* **78**, 436–450 (2018).
- 1026 30. Bindea, G. *et al.* Spatiotemporal Dynamics of Intratumoral Immune Cells  
1027 Reveal the Immune Landscape in Human Cancer. *Immunity* **39**, 782–795  
1028 (2013).
- 1029 31. Choueiri, T. K. *et al.* Biomarker analyses from JAVELIN Renal 101: Avelumab  
1030 + axitinib (A+Ax) versus sunitinib (S) in advanced renal cell carcinoma (aRCC).  
1031 *J. Clin. Oncol.* **37**, 101–101 (2019).
- 1032 32. Wang, T. *et al.* An empirical approach leveraging tumorgrafts to dissect the  
1033 tumor microenvironment in renal cell carcinoma identifies missing link to  
1034 prognostic inflammatory factors. *Cancer Discov.* **8**, 1142–1155 (2018).
- 1035 33. Voss, M. H. *et al.* Treatment outcome with mTOR inhibitors for metastatic renal  
1036 cell carcinoma with nonclear and sarcomatoid histologies. *Ann. Oncol.* **25**,  
1037 663–668 (2014).



- 1038 34. Corsello, S. M. *et al.* Discovering the anticancer potential of non-oncology  
1039 drugs by systematic viability profiling. *Nat. Cancer* **1**, 235–248 (2020).
- 1040 35. Singh, R. R. *et al.* Intratumoral morphologic and molecular heterogeneity of  
1041 rhabdoid renal cell carcinoma: Challenges for personalized therapy. *Mod.*  
1042 *Pathol.* **28**, 1225–1235 (2015).
- 1043 36. Creighton, C. J. *et al.* Comprehensive molecular characterization of clear cell  
1044 renal cell carcinoma. *Nature* **499**, 43–49 (2013).
- 1045 37. Gökden, N. *et al.* Renal cell carcinoma with rhabdoid features. *Am. J. Surg.*  
1046 *Pathol.* **24**, 1329–38 (2000).
- 1047 38. Shuch, B. *et al.* Cytoreductive Nephrectomy for Kidney Cancer With  
1048 Sarcomatoid Histology—Is Up-Front Resection Indicated and, if Not, is it  
1049 Avoidable? *J. Urol.* **182**, 2164–2171 (2009).
- 1050 39. De Peralta-Venturina, M. *et al.* Sarcomatoid differentiation in renal cell  
1051 carcinoma: A study of 101 cases. *Am. J. Surg. Pathol.* **25**, 275–284 (2001).
- 1052 40. Alevizakos, M., Gaitanidis, A., Nasioudis, D., Msaouel, P. & Appleman, L. J.  
1053 Sarcomatoid Renal Cell Carcinoma: Population-Based Study of 879 Patients.  
1054 *Clin. Genitourin. Cancer* **17**, e447–e453 (2019).
- 1055 41. Joseph, R. W. *et al.* PD-1 and PD-L1 Expression in Renal Cell Carcinoma with  
1056 Sarcomatoid Differentiation. *Cancer Immunol Res* **3**, (2015).
- 1057 42. Kawakami, F. *et al.* Programmed cell death ligand 1 and tumor-infiltrating  
1058 lymphocyte status in patients with renal cell carcinoma and sarcomatoid  
1059 dedifferentiation. *Cancer* **123**, 4823–4831 (2017).
- 1060 43. Tauriello, D. V. F. *et al.* TGF $\beta$  drives immune evasion in genetically

- 1061 reconstituted colon cancer metastasis. *Nature* **554**, 538–543 (2018).
- 1062 44. Mariathasan, S. *et al.* TGF $\beta$  attenuates tumour response to PD-L1 blockade by  
1063 contributing to exclusion of T cells. *Nature* **554**, 544–548 (2018).
- 1064 45. Rydenfelt, M., Wongchenko, M., Klinger, B., Yan, Y. & Blüthgen, N. The  
1065 cancer cell proteome and transcriptome predicts sensitivity to targeted and  
1066 cytotoxic drugs. *Life Sci. Alliance* **2**, (2019).
- 1067 46. Rees, M. G. *et al.* Correlating chemical sensitivity and basal gene expression  
1068 reveals mechanism of action. *Nat. Chem. Biol.* **12**, 109–116 (2016).
- 1069 47. Shen, C. & Kaelin, W. G. The VHL/HIF axis in clear cell renal carcinoma.  
1070 *Seminars in Cancer Biology* **23**, 18–25 (2013).
- 1071 48. Delahunt, B. *et al.* The International Society of Urological Pathology (ISUP)  
1072 grading system for renal cell carcinoma and other prognostic parameters. *Am.*  
1073 *J. Surg. Pathol.* **37**, 1490–1504 (2013).
- 1074 49. Fifield, A. L. *et al.* Molecular Inhibitor of QSOX1 Suppresses Tumor Growth in  
1075 vivo. *Mol. Cancer Ther.* molcanther.0233.2019 (2019). doi:10.1158/1535-  
1076 7163.mct-19-0233
- 1077 50. Cerami, E. *et al.* The cBio Cancer Genomics Portal: An Open Platform for  
1078 Exploring Multidimensional Cancer Genomics Data: Figure 1. *Cancer Discov.*  
1079 **2**, 401–404 (2012).
- 1080 51. Gao, J. *et al.* Integrative Analysis of Complex Cancer Genomics and Clinical  
1081 Profiles Using the cBioPortal. *Sci. Signal.* **6**, p11–p11 (2013).
- 1082 52. Garcia, E. P. *et al.* Validation of OncoPanel: A Targeted Next-Generation  
1083 Sequencing Assay for the Detection of Somatic Variants in Cancer. *Arch.*

- 1084            *Pathol. Lab. Med.* **141**, 751–758 (2017).
- 1085    53.    Tsherniak, A. *et al.* Defining a Cancer Dependency Map. *Cell* **170**, 564-  
1086            576.e16 (2017).
- 1087    54.    Cibulskis, K. *et al.* ContEst: estimating cross-contamination of human samples  
1088            in next-generation sequencing data. *Bioinformatics* **27**, 2601–2602 (2011).
- 1089    55.    Cibulskis, K. *et al.* Sensitive detection of somatic point mutations in impure and  
1090            heterogeneous cancer samples. *Nat. Biotechnol.* **31**, 213–219 (2013).
- 1091    56.    Saunders, C. T. *et al.* Strelka: accurate somatic small-variant calling from  
1092            sequenced tumor–normal sample pairs. *Bioinformatics* **28**, 1811–1817 (2012).
- 1093    57.    Costello, M. *et al.* Discovery and characterization of artifactual mutations in  
1094            deep coverage targeted capture sequencing data due to oxidative DNA  
1095            damage during sample preparation. *Nucleic Acids Res.* **41**, e67–e67 (2013).
- 1096    58.    Lawrence, M. S. *et al.* Discovery and saturation analysis of cancer genes  
1097            across 21 tumour types. *Nature* **505**, 495–501 (2014).
- 1098    59.    McKenna, A. *et al.* The Genome Analysis Toolkit: a MapReduce framework for  
1099            analyzing next-generation DNA sequencing data. *Genome Res.* **20**, 1297–303  
1100            (2010).
- 1101    60.    Mermel, C. H. *et al.* GISTIC2.0 facilitates sensitive and confident localization of  
1102            the targets of focal somatic copy-number alteration in human cancers.  
1103            *Genome Biol.* **12**, R41 (2011).
- 1104    61.    Carter, S. L. *et al.* Absolute quantification of somatic DNA alterations in human  
1105            cancer. *Nat. Biotechnol.* **30**, 413–421 (2012).

- 1106 62. McLaren, W. *et al.* The Ensembl Variant Effect Predictor. *Genome Biol.* **17**,  
1107 122 (2016).
- 1108 63. Ramos, A. H. *et al.* Oncotator: Cancer Variant Annotation Tool. *Hum. Mutat.*  
1109 **36**, E2423–E2429 (2015).
- 1110 64. Adzhubei, I. A. *et al.* A method and server for predicting damaging missense  
1111 mutations. *Nat. Methods* **7**, 248–249 (2010).
- 1112 65. Reva, B., Antipin, Y. & Sander, C. Predicting the functional impact of protein  
1113 mutations: application to cancer genomics. *Nucleic Acids Res.* **39**, e118–e118  
1114 (2011).
- 1115 66. Dobin, A. *et al.* STAR: ultrafast universal RNA-seq aligner. *Bioinformatics* **29**,  
1116 15–21 (2013).
- 1117 67. Li, B. & Dewey, C. N. RSEM: accurate transcript quantification from RNA-Seq  
1118 data with or without a reference genome. *BMC Bioinformatics* **12**, 323 (2011).
- 1119 68. DeLuca, D. S. *et al.* RNA-SeQC: RNA-seq metrics for quality control and  
1120 process optimization. *Bioinformatics* **28**, 1530–1532 (2012).
- 1121 69. Johnson, W. E., Li, C. & Rabinovic, A. Adjusting batch effects in microarray  
1122 expression data using empirical Bayes methods. *Biostatistics* **8**, 118–127  
1123 (2007).
- 1124 70. Liberzon, A. *et al.* The Molecular Signatures Database Hallmark Gene Set  
1125 Collection. *Cell Syst.* **1**, 417–425 (2015).
- 1126 71. Hänzelmann, S., Castelo, R. & Guinney, J. GSVA: gene set variation analysis  
1127 for microarray and RNA-Seq data. *BMC Bioinformatics* **14**, 7 (2013).

- 1128 72. Newman, A. M. *et al.* Determining cell type abundance and expression from  
1129 bulk tissues with digital cytometry. *Nat. Biotechnol.* **37**, 773–782 (2019).
- 1130 73. Newman, A. M. *et al.* Robust enumeration of cell subsets from tissue  
1131 expression profiles. *Nat. Methods* **12**, 453–457 (2015).
- 1132 74. Eisenhauer, E. A. *et al.* New response evaluation criteria in solid tumours:  
1133 Revised RECIST guideline (version 1.1). *Eur. J. Cancer* **45**, 228–247 (2009).
- 1134 75. Heng, D. Y. C. *et al.* Prognostic factors for overall survival in patients with  
1135 metastatic renal cell carcinoma treated with vascular endothelial growth factor-  
1136 targeted agents: results from a large, multicenter study. *J. Clin. Oncol.* **27**,  
1137 5794–9 (2009).
- 1138 76. Motzer, R. J., Bacik, J., Murphy, B. A., Russo, P. & Mazumdar, M. Interferon-  
1139 Alfa as a Comparative Treatment for Clinical Trials of New Therapies Against  
1140 Advanced Renal Cell Carcinoma. *J. Clin. Oncol.* **20**, 289–296 (2002).
- 1141
- 1142

## 1143 **Figure Legends**

1144 **Figure 1:** Genomic characterization of S/R RCC reveals distinctive genomic  
1145 features. (a) Overview of the clinical, molecular, and cell line data. (b) Comparison of  
1146 S/R vs. non-S/R RCC by mutations & indels, deep deletions, and high amplifications  
1147 in the CheckMate, OncoPanel, and TCGA cohorts.

1148 \* $q < 0.05$  (Fisher's method meta-analysis of Fisher's exact tests); ICI: Immune  
1149 Checkpoint Inhibitor; IF: Immunofluorescence; IHC: Immunohistochemistry; RNA-  
1150 seq: RNA-sequencing; S/R: Sarcomatoid/Rhabdoid; TCGA: The Cancer Genome  
1151 Atlas; WES: Whole Exome Sequencing

1152 **Figure 2:** Transcriptional profiling of S/R RCC reveals the molecular correlates of its  
1153 poor prognosis and identifies subsets of non-S/R tumors associated with a poor  
1154 prognosis. (a) Heatmap and bar plots of the ssGSEA scores and GSEA normalized  
1155 enrichment scores for the non-immune "Hallmark" gene sets that were found to be  
1156 significantly enriched ( $q < 0.25$ ) in S/R compared to non-S/R RCC in both the TCGA  
1157 and CheckMate cohorts independently. (b) Kaplan-Meier curves for OS by *MYC* v1  
1158 score within the S/R group of the CheckMate (anti-PD-1 arm) and TCGA (stage IV)  
1159 cohorts; *MYC* v1 score dichotomized at the median. (c) Kaplan-Meier curves for OS  
1160 by *MYC* v1 score within the non-S/R group of the CheckMate (anti-PD-1 arm) and  
1161 TCGA (stage IV) cohorts; *MYC* v1 score dichotomized at the median of the S/R  
1162 group.

1163 EMT: Epithelial Mesenchymal Transition; *MYC* v1: *MYC* Targets Version 1; S/R:  
1164 Sarcomatoid/Rhabdoid; TCGA: The Cancer Genome Atlas

1165 **Figure 3:** Improved clinical outcomes of S/R RCC tumors on immune checkpoint  
1166 inhibitors across clinical trial and real-world cohorts. OS on ICI compared to non-ICI

1167 in the (a) Harvard, (b) IMDC, and (c) CheckMate S/R RCC cohorts. TTF on ICI  
1168 compared to non-ICI in the (d) Harvard and (e) IMDC S/R RCC cohorts, and (f) PFS  
1169 in the CheckMate S/R RCC cohort. (g) Summary table of overall response rate  
1170 (among evaluable patients) on ICI compared to non-ICI in patients with S/R RCC  
1171 across the Harvard, IMDC, and CheckMate cohorts.

1172 95% CI: 95% Confidence Interval; Adj. Adjusted; Ever: Everolimus; HR: Hazard  
1173 Ratio; ICI: Immune Checkpoint Inhibitor; IMDC: International Metastatic Renal Cell  
1174 Carcinoma Database Consortium; Nivo: Nivolumab; NE: Not Evaluable; OS: Overall  
1175 Survival; S/R: Sarcomatoid/Rhabdoid.

1176 \* Adjusted for IMDC (International Metastatic Renal Cell Carcinoma Database  
1177 Consortium) risk groups, line of therapy, and background histology.

1178 \*\* Adjusted for MSKCC (Memorial Sloan Kettering Cancer Center) risk groups

1179 **Figure 4:** (a) Heatmap and bar plots of the ssGSEA scores and GSEA normalized  
1180 enrichment scores for the immune “Hallmark” gene sets that were found to be  
1181 significantly enriched ( $q < 0.25$ ) in S/R compared to non-S/R RCC in the TCGA and  
1182 CheckMate cohorts independently. (b) Boxplots of the comparison of CIBERSORTx  
1183 and Th immune cell populations between S/R and non-S/R RCC, with Mann-Whitney  
1184 U test comparisons corrected for multiple comparison testing (q value reported).  
1185 Only variables which were significant ( $q < 0.05$ ) in both the CheckMate and TCGA  
1186 cohorts independently are shown. The CheckMate results are displayed in this  
1187 figure. (c) Bar plot of the comparison of the proportions of tumors that were PD-L1  
1188 positive ( $\geq 1\%$  on tumor cells) in S/R compared to non-S/R RCC. Fisher’s exact test  
1189 p-value reported.

1190 TCGA: The Cancer Genome Atlas.



1191 **Supplementary Figure Legends**

1192 **Figure S1:** Co-mutation plot of patients with S/R RCC across the CheckMate,  
1193 OncoPanel, and TCGA cohorts (in relation to Fig. 1). OncoPanel (all versions) did  
1194 not include *KMT2C* or *RELN*. OncoPanel v1 did not include *KDM5C*, *KMT2D*, or  
1195 *PBRM1* genes. The percentage mutated numbers take this into account by excluding  
1196 the corresponding patients from the percentage calculation.

1197 Alt: Alteration; TCGA: The Cancer Genome Atlas; WES: Whole Exome Sequencing

1198 **Figure S2:** S/R RCC tumors have a similar overall (a) tumor mutational burden, (b)  
1199 total indel load, and (c) frameshift indel load compared to non-S/R RCC tumors in  
1200 the CheckMate, TCGA, and OncoPanel cohorts (in relation to Fig. 1). Mann-Whitney  
1201 U test p-values shown.

1202 Muts: Mutations; Mb: Megabase; S/R: Sarcomatoid/Rhabdoid; TMB: Tumor  
1203 Mutational Burden.

1204 **Figure S3:** Limited intra-tumoral mutational heterogeneity of S/R RCC tumors (in  
1205 relation to Fig. 1). (a) S/R RCC tumors have a similar intra-tumoral heterogeneity  
1206 index to non-S/R RCC tumors in the CheckMate and TRACERx Renal cohorts. (b)  
1207 Similar tumor mutational burden, total indel load, and frameshift indel load between  
1208 the mesenchymal (S/R) and epithelioid (non-S/R) components within S/R RCC  
1209 tumors in the OncoPanel cohort. (c) Similar tumor mutational burden, total indel load,  
1210 and frameshift indel load between the mesenchymal (S) and epithelioid or clear cell  
1211 (non-S) components within S RCC tumors in the Malouf cohort. Mann-Whitney U test  
1212 p-values shown in (a) and (b). Paired Wilcoxon signed rank test p-value shown in (c).

1213 Muts: Mutations; Mb: Megabase; S/R: Sarcomatoid/Rhabdoid; TMB: Tumor  
1214 Mutational Burden.

1215 **Figure S4:** Transcriptional profiling of S/R RCC reveals the molecular correlates of  
1216 its poor prognosis and identifies subsets of non-S/R tumors associated with a poor  
1217 prognosis (in relation to Fig. 2). (a) Kaplan-Meier curves for PFS by *MYC* v1 score  
1218 within the S/R group of the CheckMate (anti-PD-1 arm) and TCGA (stage IV)  
1219 cohorts; *MYC* v1 score dichotomized at the median. (b) Kaplan-Meier curves for OS  
1220 and PFS by *MYC* v1 score within the S/R group of the CheckMate (mTORi arm)  
1221 cohort; *MYC* v1 score dichotomized at the median. (c) Kaplan-Meier curves for PFS  
1222 by *MYC* v1 score within the non-S/R group of the CheckMate (anti-PD-1 arm) and  
1223 TCGA (stage IV) cohorts; *MYC* v1 score dichotomized at the median of the S/R  
1224 group.

1225 *MYC* v1: *MYC* Targets Version 1; S/R: Sarcomatoid/Rhabdoid; TCGA: The Cancer  
1226 Genome Atlas; mTORi: Mammalian Target of Rapamycin Inhibitors

1227 **Figure S5:** Upregulation of *MYC*-regulated gene expression and correlation with  
1228 outcomes in S/R RCC (in relation to Fig. 2). (a) Enrichment of “Founder” gene sets of  
1229 the “Hallmark” *MYC* v1 and v2 gene sets in the CheckMate and TCGA cohorts by  
1230 GSEA. Kaplan-Meier curves for OS by *MYC* v2 score within the S/R group of the  
1231 CheckMate (anti-PD-1 arm) and TCGA (stage IV) cohorts; *MYC* v1 score  
1232 dichotomized at the median.

1233 GSEA: Gene Set Enrichment Analysis; *MYC* v2: *MYC* Targets Version 2; NES:  
1234 Normalized Enrichment Score; S/R: Sarcomatoid/Rhabdoid; TCGA: The Cancer  
1235 Genome Atlas;

1236 **Figure S6:** The improved outcomes of S/R RCC tumors on immune checkpoint  
1237 inhibitors across clinical trial and real-world cohorts may be accounted for by an  
1238 immune-inflamed phenotype (in relation to Fig. 4). (a) Boxplots of the comparison of

1239 CIBERSORTx and T helper immune cell populations between S/R and non-S/R  
1240 RCC, with Mann-Whitney U test comparisons corrected for multiple comparison  
1241 testing (q value reported). Only variables which were significant ( $q < 0.05$ ) in both the  
1242 CheckMate and TCGA cohorts independently were shown. The TCGA results are  
1243 displayed in this figure. Boxplots of the comparison of CD8+ T cell density at the (b)  
1244 tumoral invasive margin and (c) throughout the tumor as determined by  
1245 immunofluorescent staining in S/R compared to non-S/R RCC. Mann-Whitney U test  
1246 p-values reported.

1247 S/R: Sarcomatoid/Rhabdoid; TCGA: The Cancer Genome Atlas.

1248 **Figure S7:** Breakdown of Z-score normalized ssGSEA scores in sarcomatoid,  
1249 rhabdoid, and sarcomatoid and rhabdoid tumors of significantly enriched non-  
1250 immune GSEA pathways in S/R RCC in the (a) CheckMate and (b) TCGA cohorts (in  
1251 relation to Fig. 2).

1252 EMT: Epithelial Mesenchymal Transition; S/R: Sarcomatoid/Rhabdoid; ssGSEA:  
1253 Single Sample Gene Set Enrichment Analysis

1254 **Figure S8:** Breakdown of Z-score normalized ssGSEA scores in sarcomatoid,  
1255 rhabdoid, and sarcomatoid and rhabdoid tumors of significantly enriched immune  
1256 GSEA pathways in S/R RCC in the (a) CheckMate and (b) TCGA cohorts (in relation  
1257 to Fig. 4).

1258 S/R: Sarcomatoid/Rhabdoid; ssGSEA: Single Sample Gene Set Enrichment Analysis

1259 **Figure S9:** Breakdown of Z-score normalized ssGSEA scores in sarcomatoid,  
1260 rhabdoid, and sarcomatoid and rhabdoid tumors of differentially enriched infiltrating  
1261 immune cell populations in S/R RCC in the (a) CheckMate and (b) TCGA cohorts (in

1262 relation to Fig. 4).

1263 S/R: Sarcomatoid/Rhabdoid; ssGSEA: Single Sample Gene Set Enrichment Analysis

1264 **Figure S10:** The improved outcomes of S/R RCC tumors on immune checkpoint

1265 inhibitors are not accounted for by *CD274* gene amplification. (a) Relationship

1266 between *CD274* (or PD-L1) gene status and PD-L1 expression in the subgroup of

1267 patients with S/R RCC that had WES and PD-L1 expression evaluated by IHC.

1268 Relationship between *CD274* (or PD-L1) gene status and survival outcomes on

1269 nivolumab in the subgroup of patients with S/R RCC that had WES and were treated

1270 by nivolumab; (b) OS and (c) PFS (in relation to Fig. 4).

1271 HA: High Amplification; LA: Low Amplification; OS: Overall Survival; PFS:

1272 Progression Free Survival.

1273 **Figure S11:** The immune-inflamed phenotype of S/R RCC tumors is independent of

1274 *BAP1* mutations. All plots exclude tumors with *BAP1* mutations in both the S/R and

1275 non-S/R RCC groups (in relation to Fig. 4). Boxplots of the comparison of

1276 CIBERSORTx and T helper immune cell populations between S/R and non-S/R

1277 RCC, with Mann-Whitney U test (p-value reported) in the (a) TCGA and (b)

1278 CheckMate cohorts, excluding *BAP1* mutants. (c) Bar plot of the comparison of the

1279 proportions of tumors that were PD-L1 positive ( $\geq 1\%$  on tumor cells) in S/R

1280 compared to non-S/R RCC, excluding *BAP1* mutants. Fisher's exact test p-value

1281 reported. (d) Boxplot of the comparison of CD8+ T cell density at the tumoral

1282 invasive margin between S/R and non-S/R RCC, excluding *BAP1* mutants. Mann-

1283 Whitney U test p-value reported.

1284 **Figure 12:** Baseline transcriptomic profiling of kidney cancer cell lines reveals that

1285 both immune and non-immune features of sarcomatoid tumors may be driven by the

1286 sarcomatoid component and suggests CDK as a potential therapeutic target. (a)  
1287 GSEA was performed on the 50 “Hallmark” gene sets to compare 6 distinct  
1288 sarcomatoid cell lines and 9 distinct non-sarcomatoid kidney cancer cell lines. (b)  
1289 Heatmap and bar plot of the ssGSEA scores and GSEA normalized enrichment  
1290 scores for the “Hallmark” gene sets that were found to be enriched in sarcomatoid  
1291 compared to non-sarcomatoid cell lines. (c) Heatmap of the Pearson correlation  
1292 coefficients between the area under curve (AUC) of the dose-response curve and  
1293 the ssGSEA scores of the two pathways which were found to be significantly  
1294 enriched in both cohorts of bulk RNA-seq and in the sarcomatoid cell lines  
1295 (epithelial-mesenchymal transition and the apoptosis-caspase pathway). Agents are  
1296 grouped by drug class and the color orange in this heatmap represents a negative  
1297 correlation between ssGSEA score and AUC (indicating that a higher ssGSEA score  
1298 correlates with greater drug sensitivity). The agents included in this figure are CDKi  
1299 as well as the mTORi and VEGFi that are FDA-approved for metastatic renal cell  
1300 carcinoma (for comparison).

1301 \* $q < 0.25$ ; CDKi: Cyclin-Dependent-Kinase Inhibitors; EMT: Epithelial Mesenchymal  
1302 Transition; FDA: Food and Drug Administration; mTORi: Mammalian Target of  
1303 Rapamycin Inhibitors; VEGFi: Vascular Endothelial Growth Factor Inhibitors.

1304 **Figure S13:** Scatter plots of correlations of transcriptomic characteristics of cell lines  
1305 with areas under the curve of dose response curves in CTRP and PRISM for two  
1306 CDK inhibitors (a) alvocidib and (b) SNS-032. Pearson r correlation coefficients  
1307 shown.

1308 AUC: Area Under the Curve; EMT: Epithelial Mesenchymal Transition.

1309 **Figure S14:** Dose-response curves of the in vitro cell line drug sensitivity assays for  
1310 (a) alvocidib, (b) SNS-032, and (c) axitinib in two sarcomatoid cell lines (UOK 127  
1311 and RCJ41-T2) and three non-sarcomatoid cell lines (Caki-2, KMRC-20, KMRC-2).

1312 **Figure S15:** Principal component analysis plots of the UQ-normalized log2-  
1313 transformed TPM matrix including the 3 known batches within the CheckMate cohort  
1314 (a) pre-ComBat and (b) post-ComBat.

1315 cm010: CheckMate 010; cm-025-b1: CheckMate 025 Batch 1; cm-025-b2:  
1316 CheckMate 025 Batch 2; PC1: Principal Component 1; PC2: Principal Component 2;  
1317 PCA : Principal Component Analysis ; TPM : Transcripts-Per-Million.

1318

1319 **Supplementary Table Legends**

1320 **Table S1:** Baseline characteristics of the TCGA, CheckMate, and OncoPanel

1321 genomic cohorts, and clinical and genomic data of the OncoPanel cohort.

1322 **Table S2:** Genomic analysis results of the TCGA, CheckMate, and OncoPanel

1323 genomic cohorts, genomic meta-analysis results, and breakdown of genomic

1324 alterations by background histology in the TCGA and OncoPanel cohorts.

1325 **Table S3:** Gene level enrichment analyses of mutations in the OncoPanel cohort

1326 between epithelioid and S/R components of different S/R RCC tumors (Fisher's

1327 exact tests) and in the Malouf cohort between epithelioid and S components of the

1328 same S RCC tumors (McNemar tests).

1329 **Table S4:** Baseline characteristics of the TCGA and CheckMate RNA-sequencing

1330 cohorts.

1331 **Table S5:** "Hallmark" and antigen presentation machinery gene set enrichment

1332 analysis results in the TCGA and CheckMate RNA-sequencing cohorts.

1333 **Table S6:** "Hallmark" single sample gene set enrichment analysis in the TCGA and

1334 CheckMate RNA-sequencing cohorts and results of Cox regression analysis with

1335 overall survival.

1336 **Table S7:** Gene-level differential gene expression analysis results (Mann-Whitney U

1337 test results) with log<sub>2</sub> fold-changes of the mean. Genes that are significantly ( $q < 0.05$ )

1338 upregulated or downregulated in the TCGA and CheckMate cohorts independently

1339 are also highlighted in separate tabs.

1340 **Table S8:** Baseline characteristics of the Harvard, IMDC, and CheckMate clinical

1341 cohorts.



1342 **Table S9:** CIBERSORTx deconvolution results in absolute mode of the CheckMate  
1343 and TCGA cohorts with single sample gene set enrichment scores for Th1, Th2, and  
1344 Th17 cells (scaled between 0 and 100) and Mann-Whitney U test comparison results  
1345 in the TCGA and CheckMate cohorts independently.

1346 **Table S10:** Baseline characteristics of patients that had their tumor tissue stained by  
1347 immunohistochemistry for PD-L1 or CD8+ T cells by immunofluorescence.

1348 **Table S11:** Raw and transformed TPM matrix of the 15 sequenced cell lines, quality  
1349 control metrics by RNA-seqQC2, “Hallmark” gene set enrichment analysis of  
1350 sarcomatoid vs. non-sarcomatoid cell lines, “Hallmark” single-sample gene set  
1351 enrichment analysis of all 15 cell lines, epithelial-mesenchymal transition and  
1352 apoptosis-caspase pathway single-sample gene set enrichment analysis of the 20  
1353 kidney cancer cell lines in CTRP v2 with drug sensitivity data, Pearson r correlation  
1354 coefficients between single-sample gene set enrichment analysis scores and areas  
1355 under the curve (AUC) of the dose-response curves for the 20 kidney cancer cell  
1356 lines in CTRP v2 and in the PRISM secondary screen.

1357 **Table S12:** Sarcomatoid and rhabdoid annotation for the TCGA KIPAN cohort.

1358 **Table S13:** List of genes evaluated in the genomic analysis and table indicating  
1359 which genes were included in each version of the OncoPanel assay

1360

1361 **Figure 1:**

a

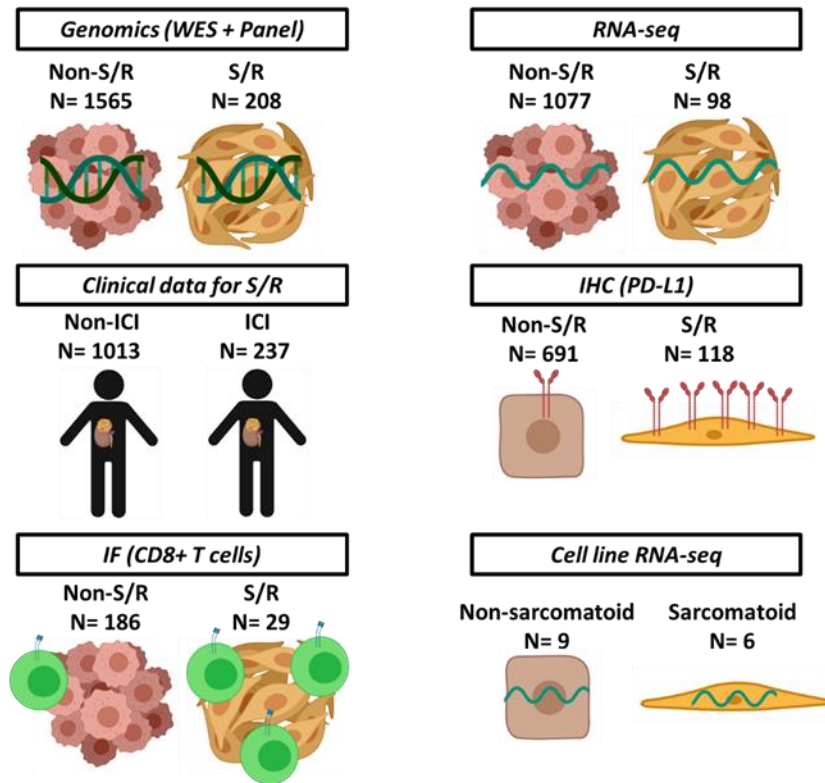

b

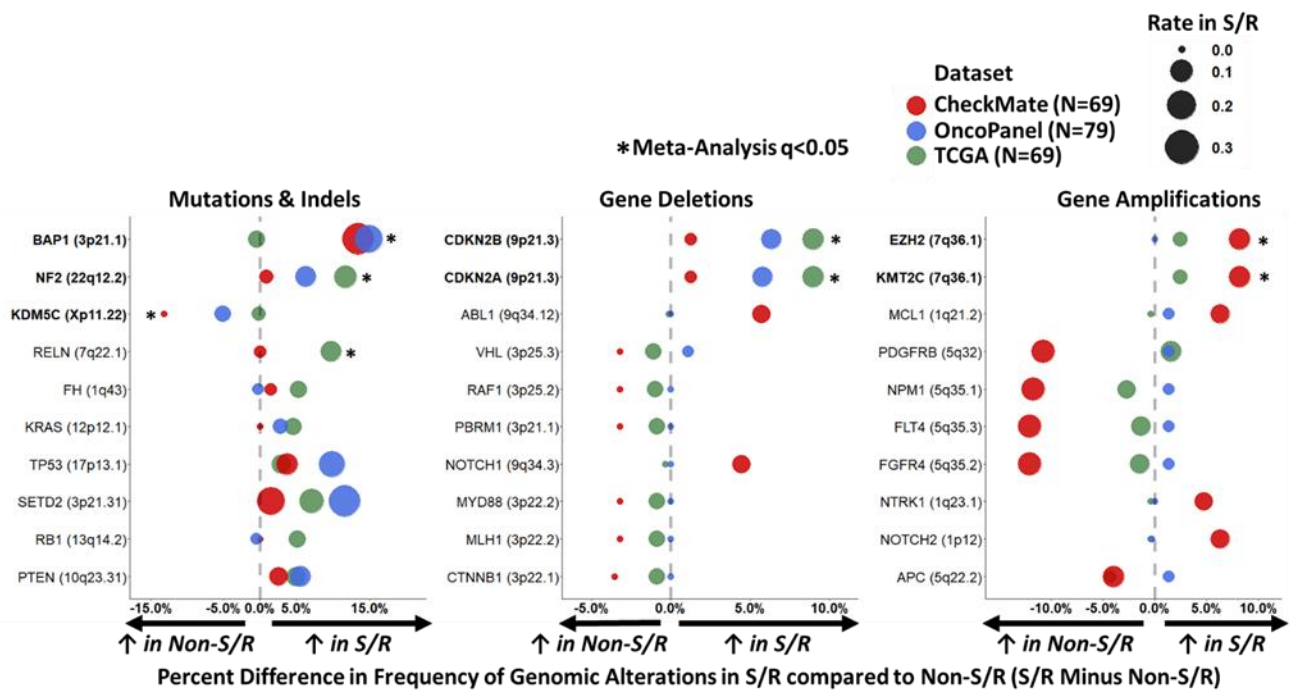

1362

1363

1364 **Figure 2:**

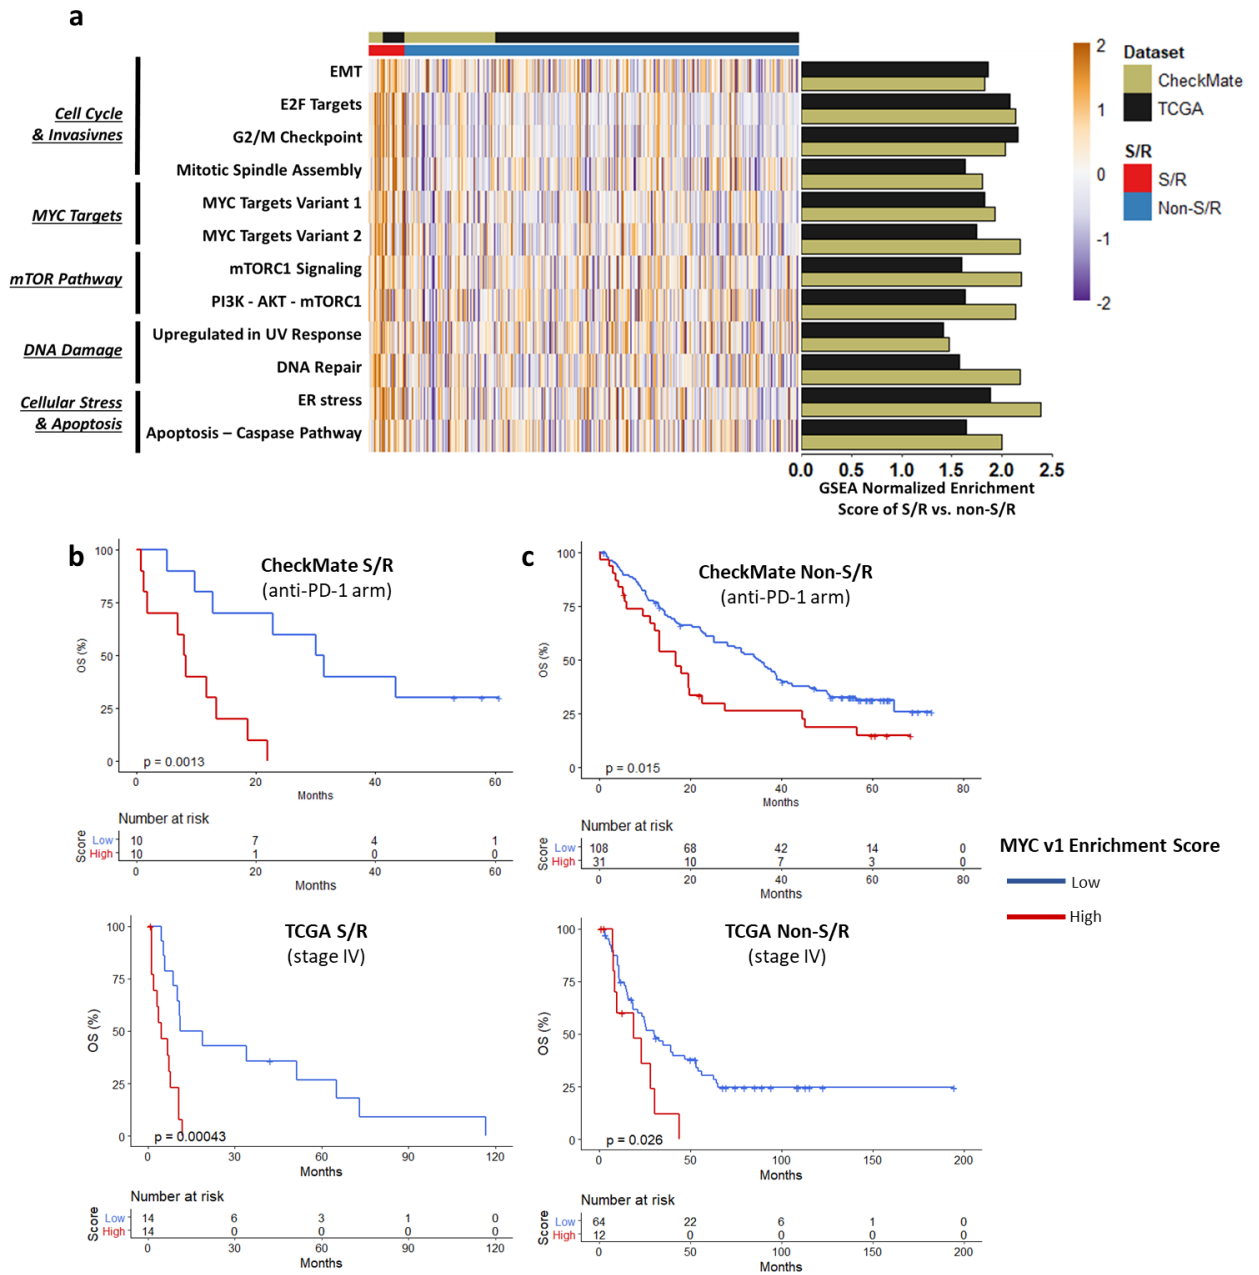

1365

1366

1367 **Figure 3:**

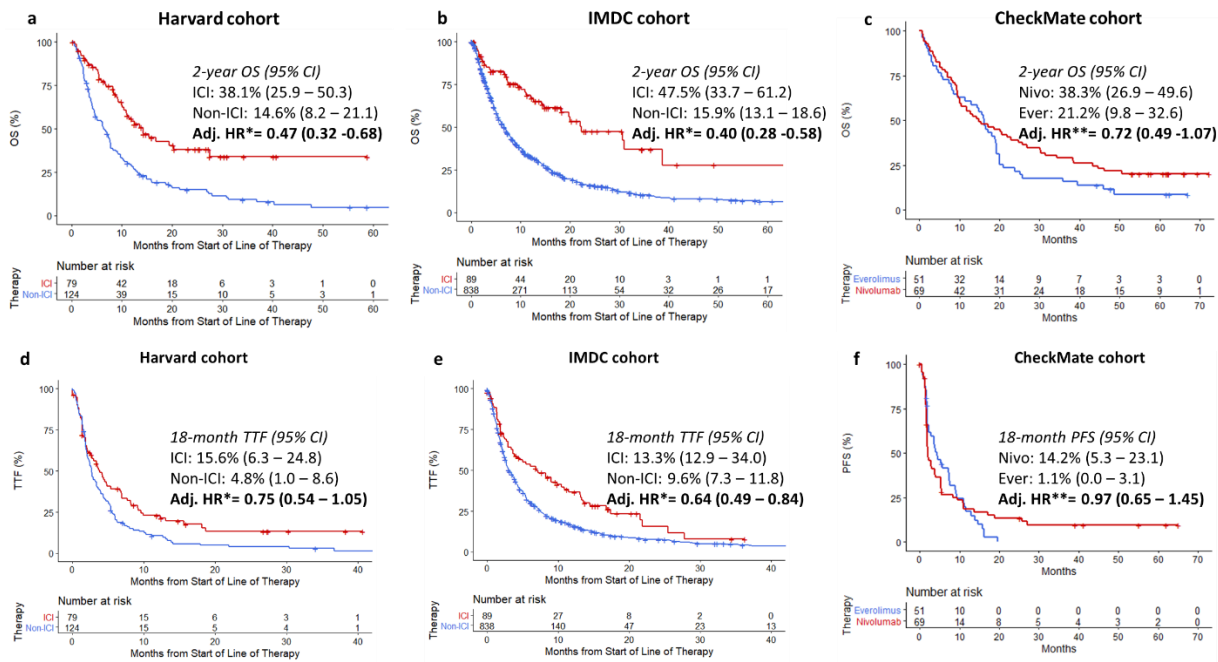

g

|                         | S/R mRCC –<br>Harvard Cohort<br>N= 178 | S mRCC –<br>IMDC Cohort<br>N= 732    | S/R mRCC –<br>CheckMate Cohort<br>N= 105 |
|-------------------------|----------------------------------------|--------------------------------------|------------------------------------------|
| ICI ORR                 | 26/72 (36.1%)                          | 22/69 (31.9%)                        | 15/62 (24.1%)                            |
| Non-ICI ORR (ref.)      | 12/106 (11.3%)                         | 104/663 (15.7%)                      | 1/43 (2.3%)                              |
| Univariable (OR)        | <b>4.4</b><br>(2.1 - 9.9)              | <b>2.5</b><br>(1.4 - 4.3)            | <b>13.4</b><br>(1.7 – 106.0)             |
| Multivariable (adj. OR) | N= 163<br><b>6.3*</b><br>(2.6 – 17.0)  | N= 654<br><b>2.5*</b><br>(1.3 - 4.7) | NE                                       |

1368

1369

1370 **Figure 4:**

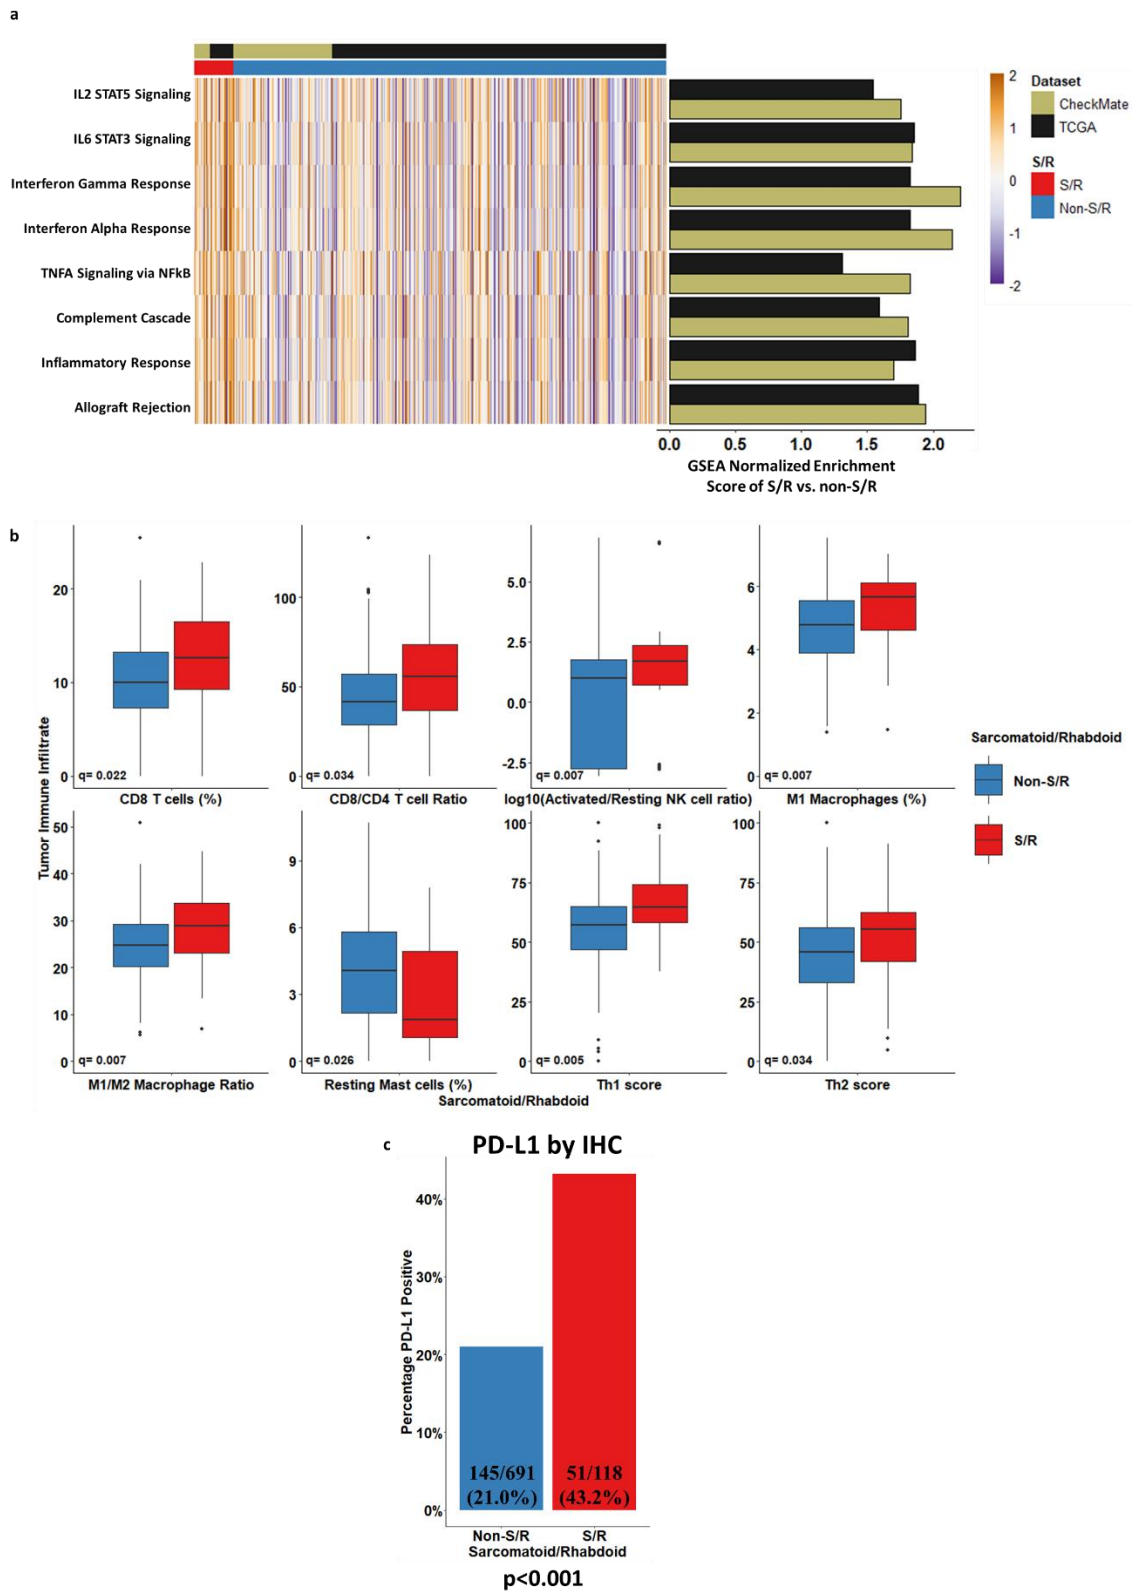

1371

1372

1373 **Figure S1:**

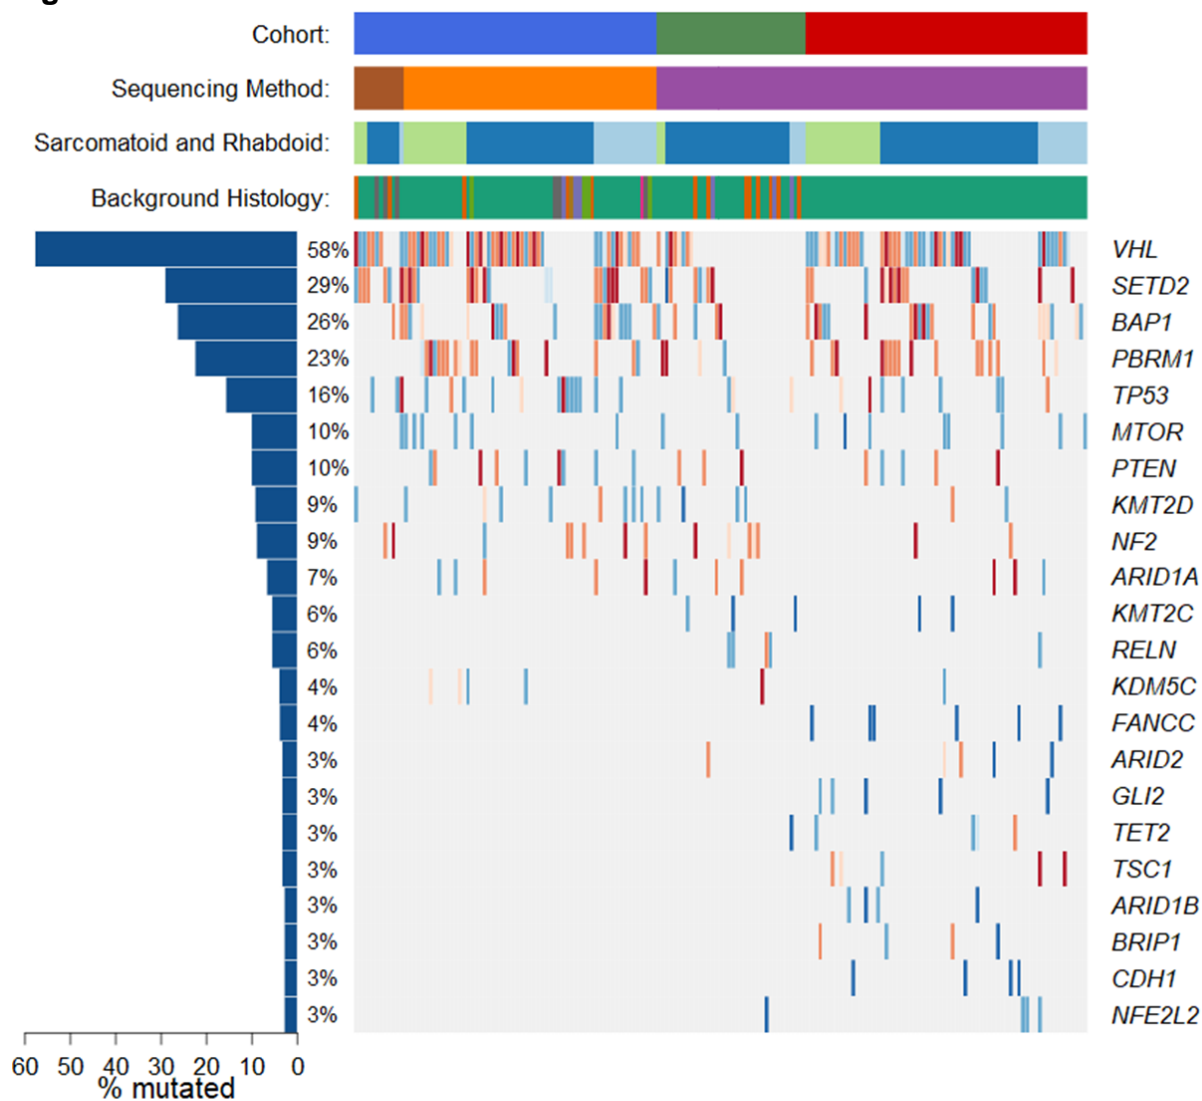

**Cohort:**

- CheckMate
- TCGA
- OncoPanel

**Sequencing Method:**

- WES
- Panel v2/v3
- Panel v1

**Sarcomatoid and Rhabdoid:**

- Sarcomatoid + Rhabdoid
- Sarcomatoid
- Rhabdoid

**Background Histology:**

- Clear cell
- Papillary
- Chromophobe
- Clear cell tubulopapillary
- Collecting duct
- Translocation
- FH deficient
- Unclassified

**Mutation:**

- Nonsense Mutation
- Frameshift Indel
- Splice Region Alt.
- Inframe Indel
- Missense Mutation
- Silent Mutation

1375 **Figure S2:**

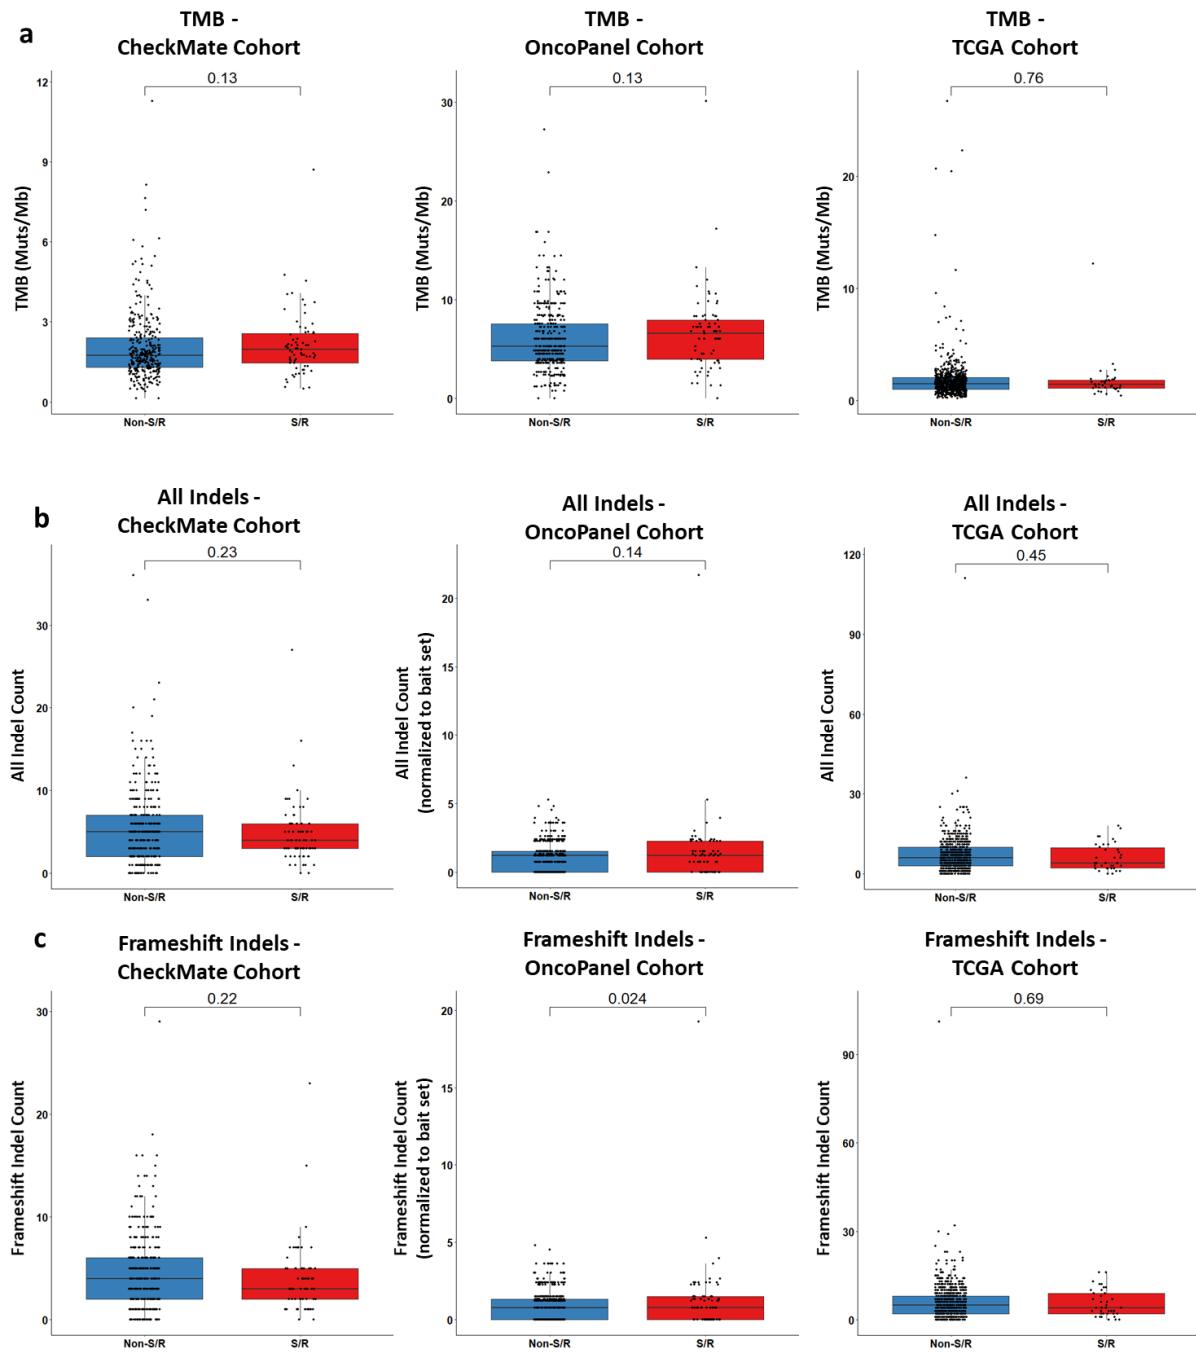

1376

1377



1378 **Figure S3:**

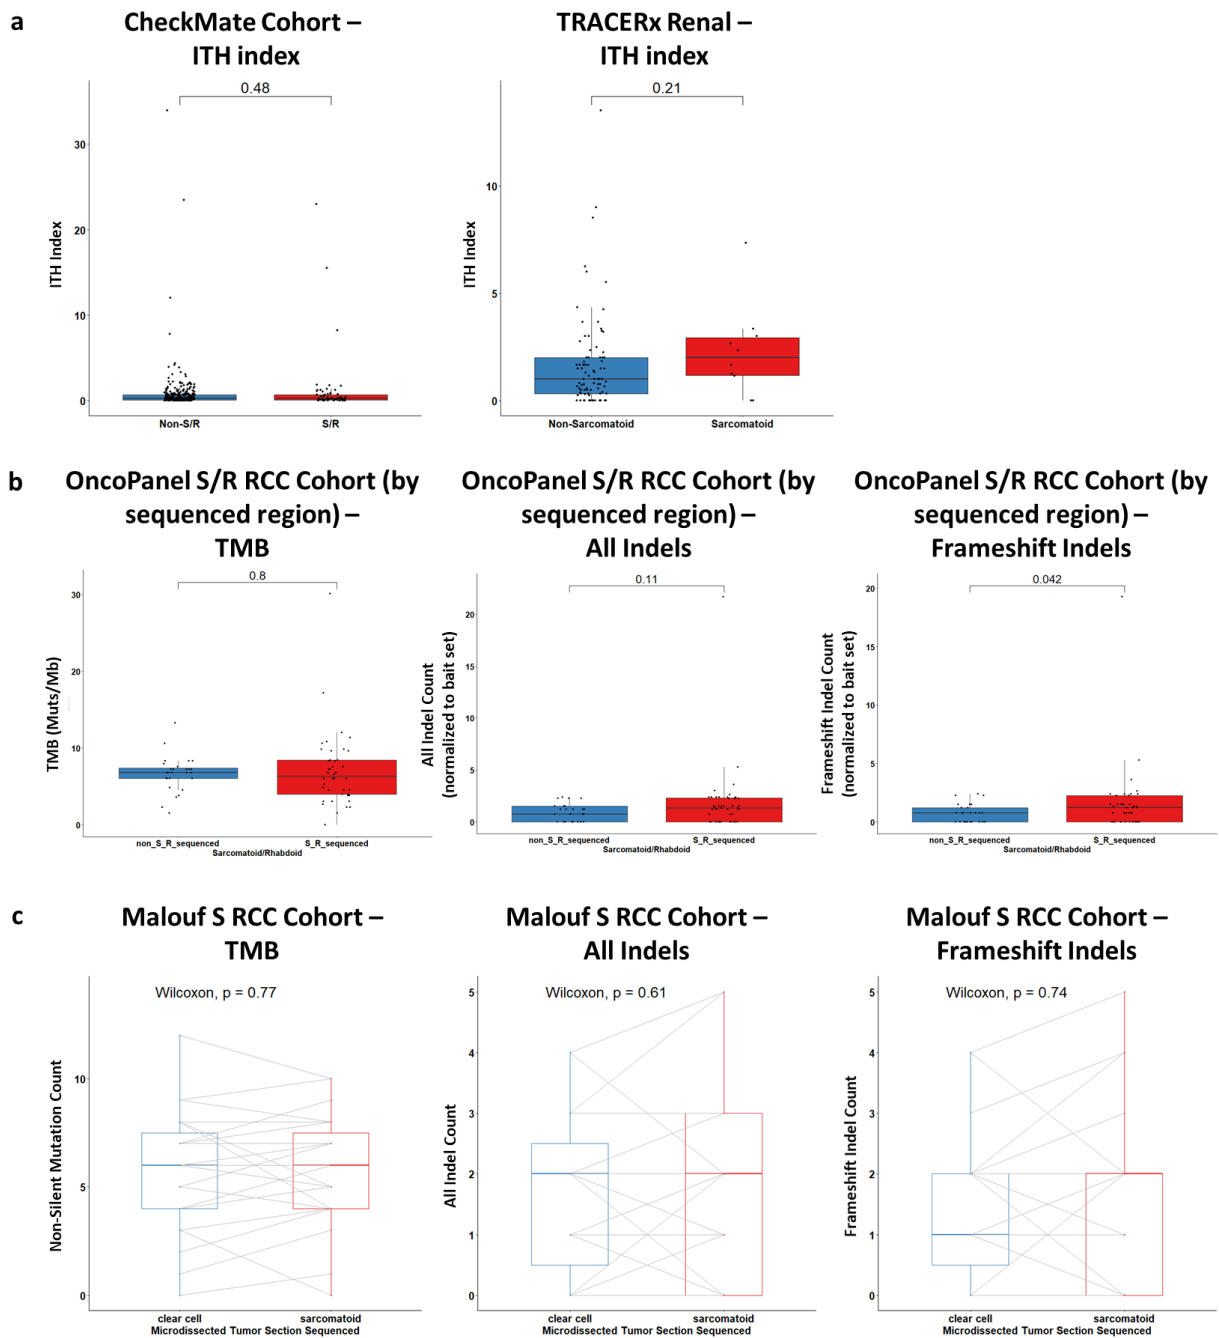

1379

1380

1381 **Figure S4:**

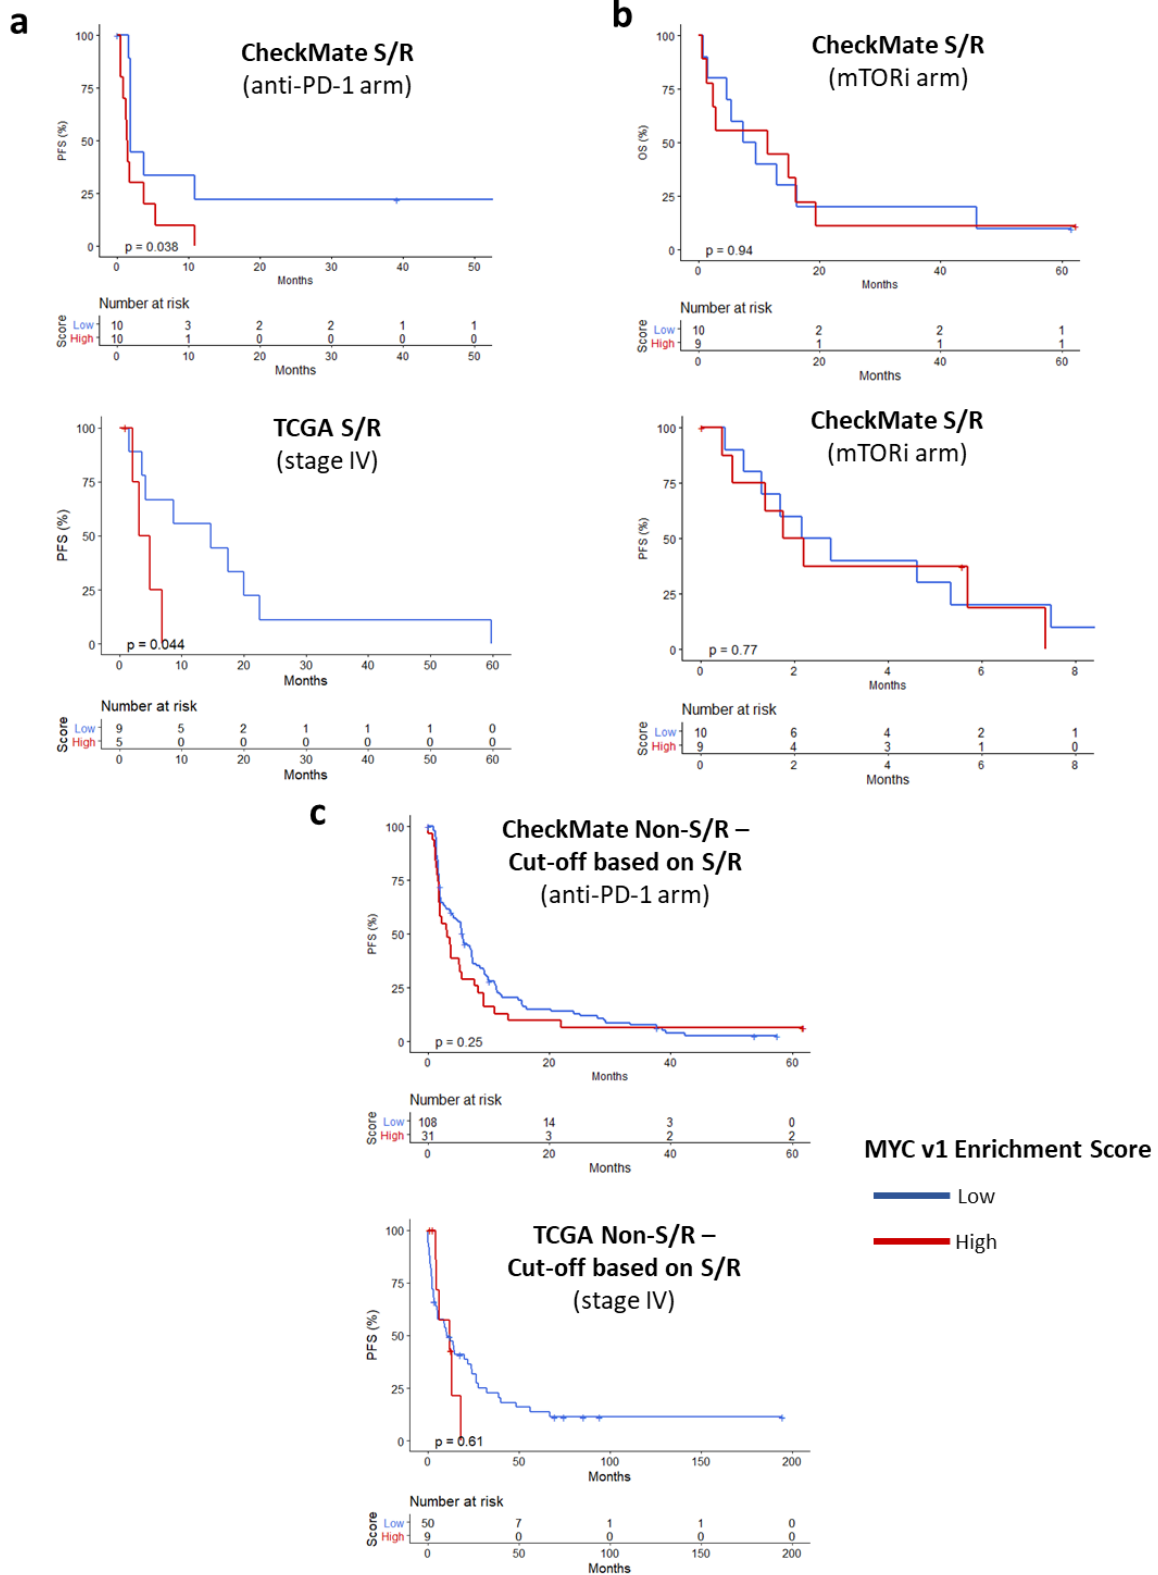

1382

1383

1384 **Figure S5:**

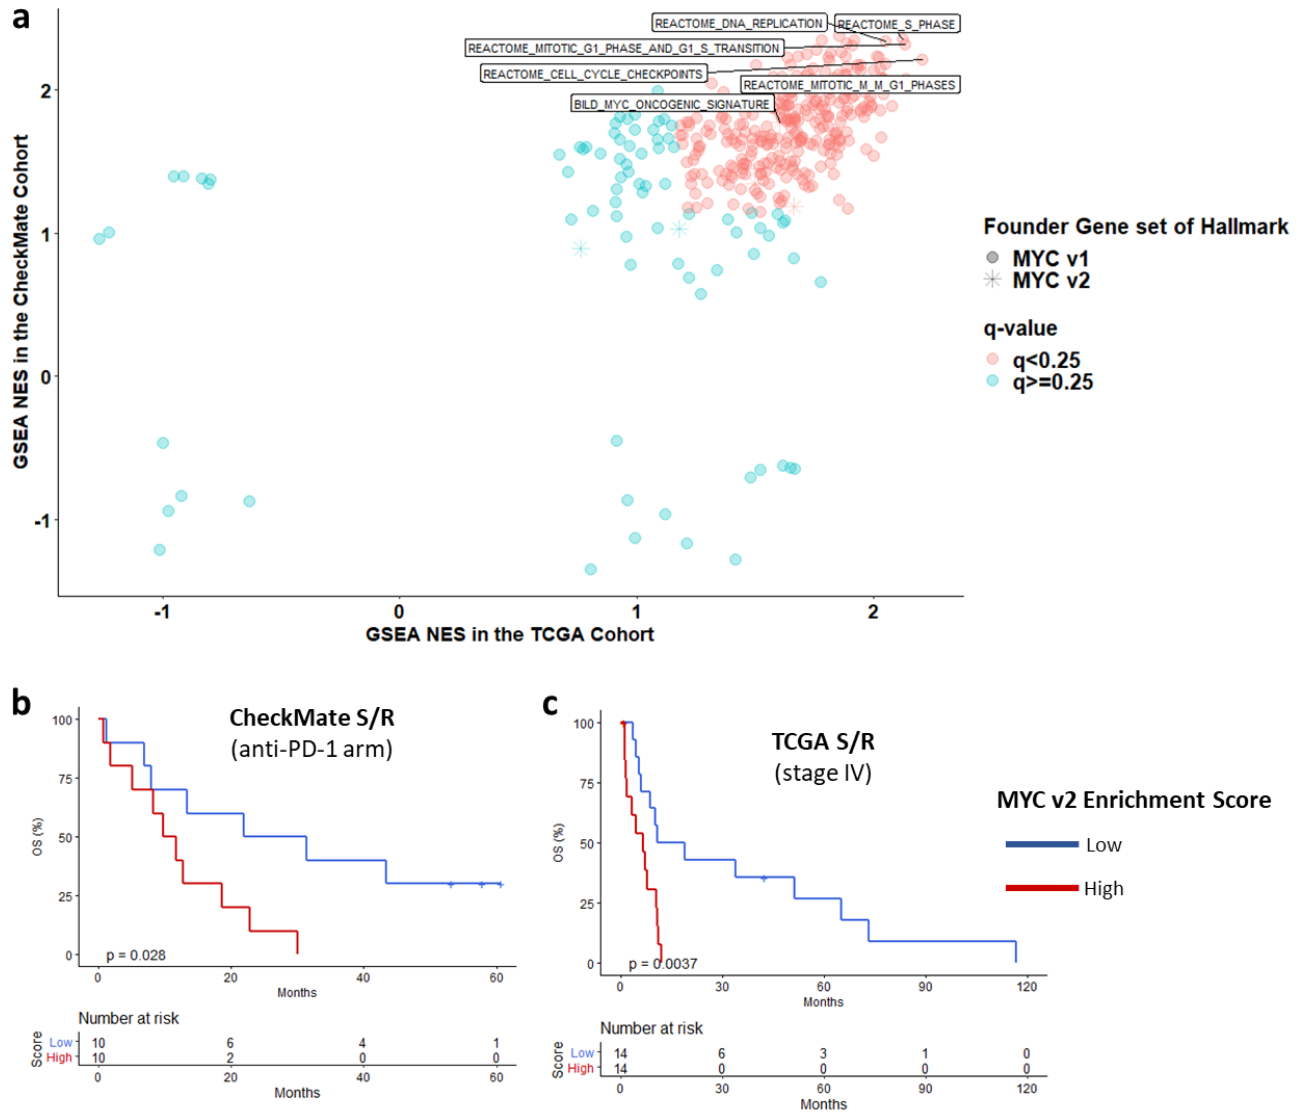

1385

1386

1387 **Figure S6:**

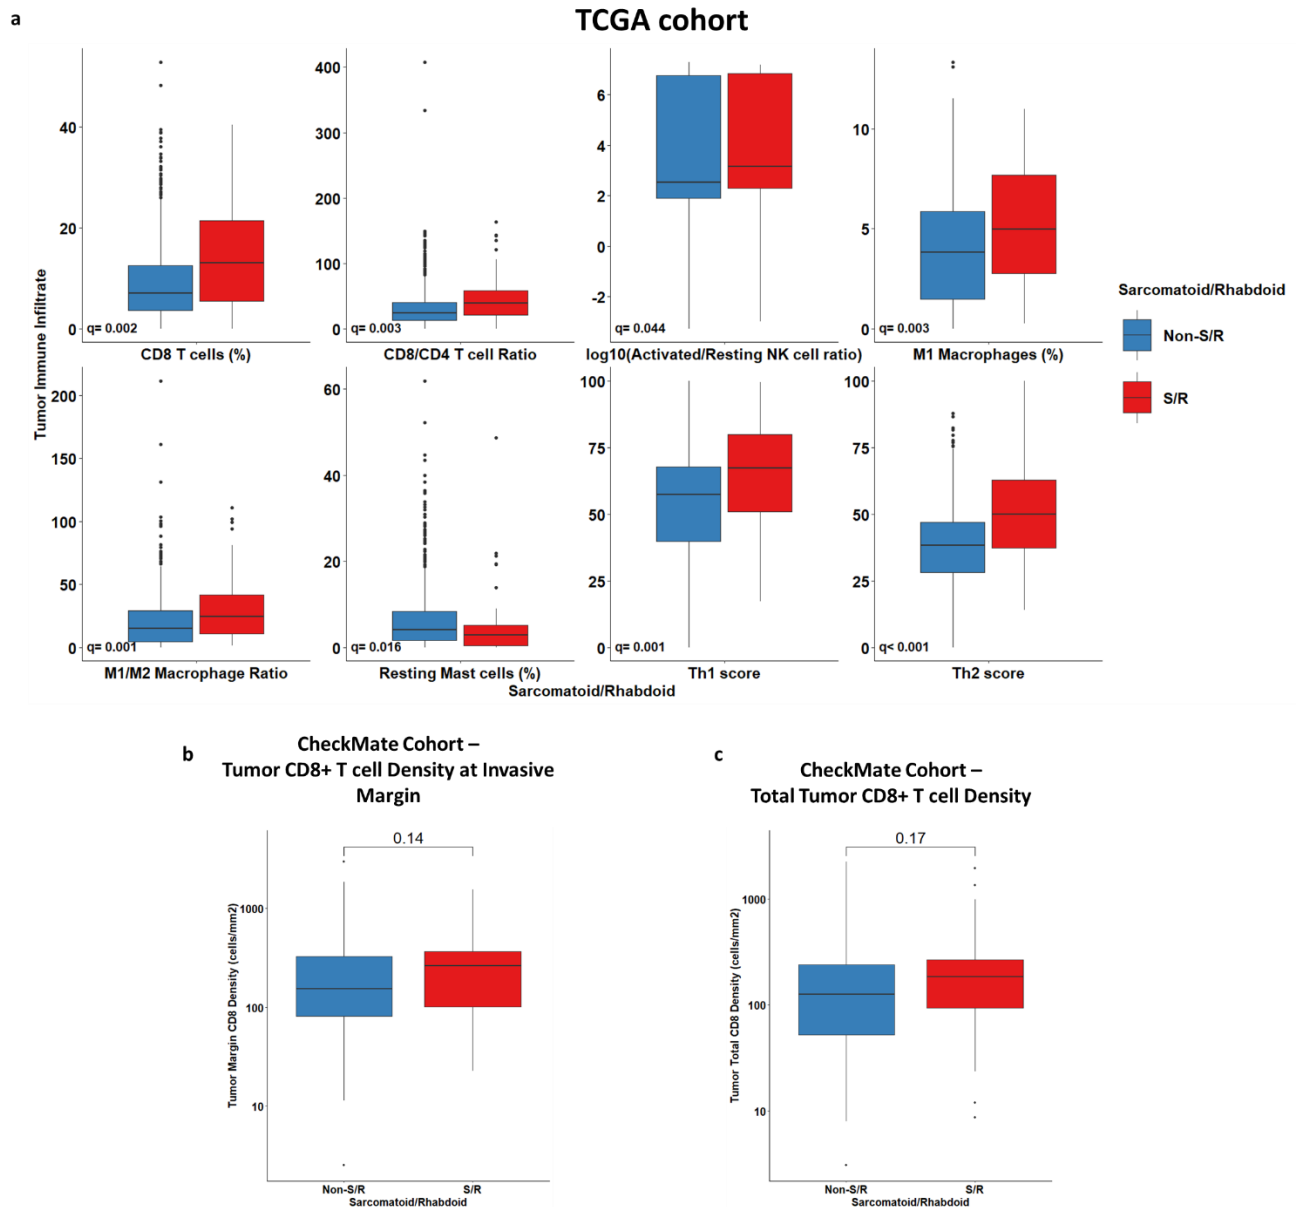

1388

1389

1390 **Figure S7:**

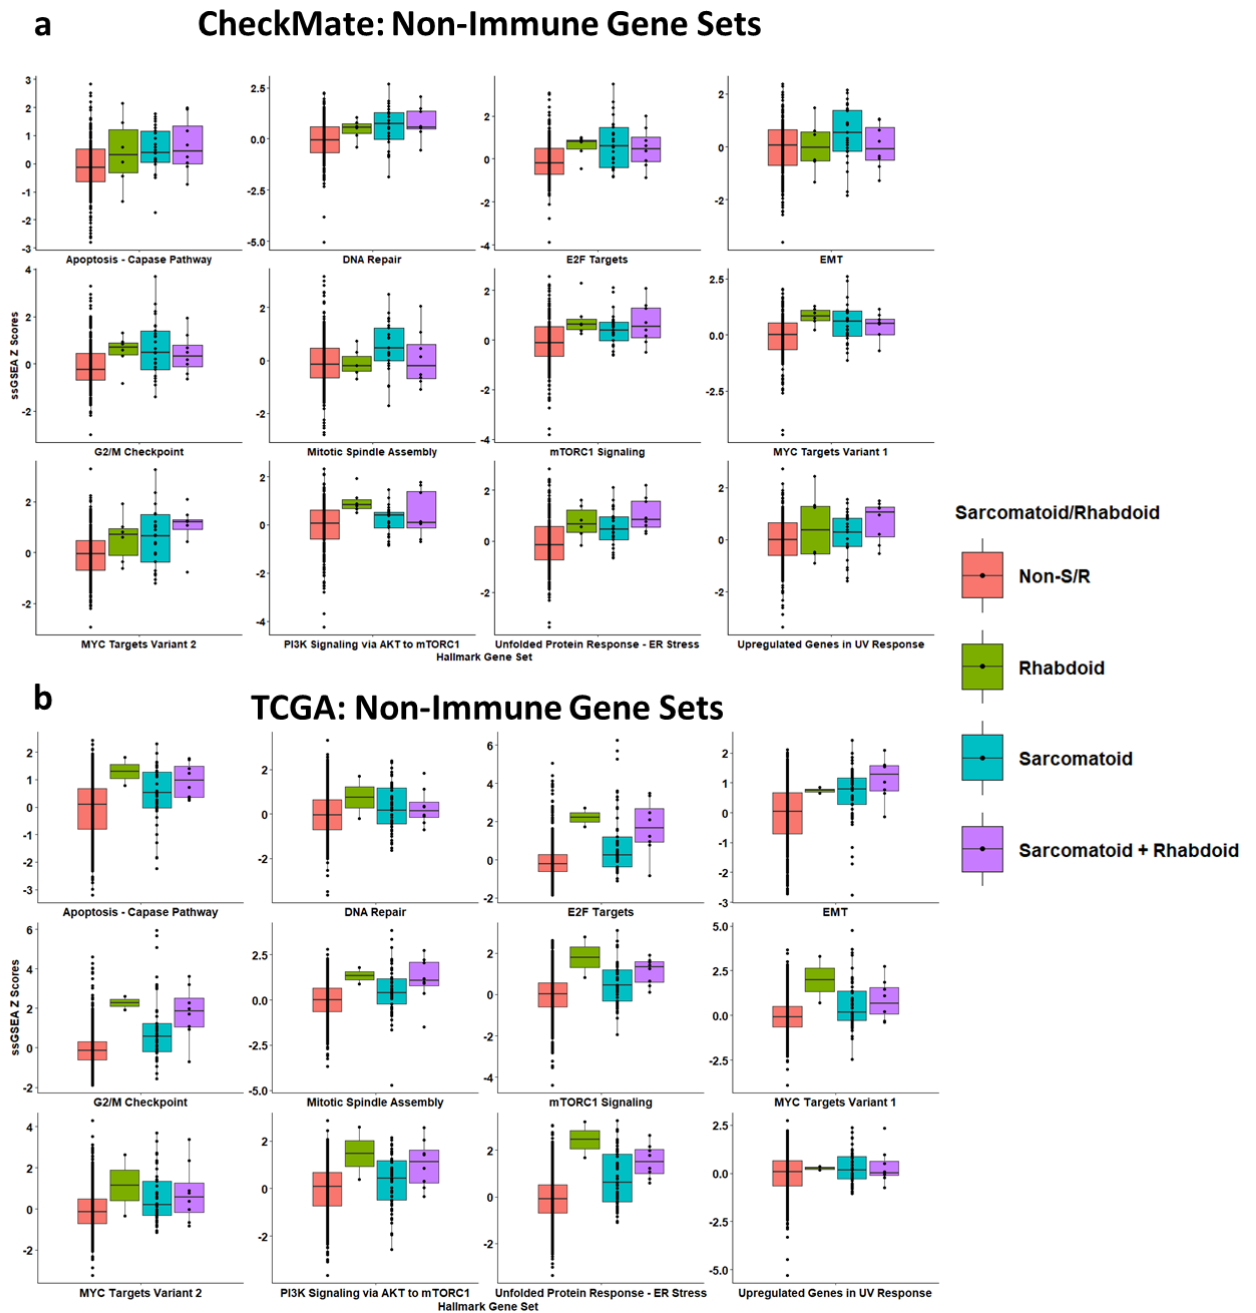

1391

1392

1393 **Figure S8:**

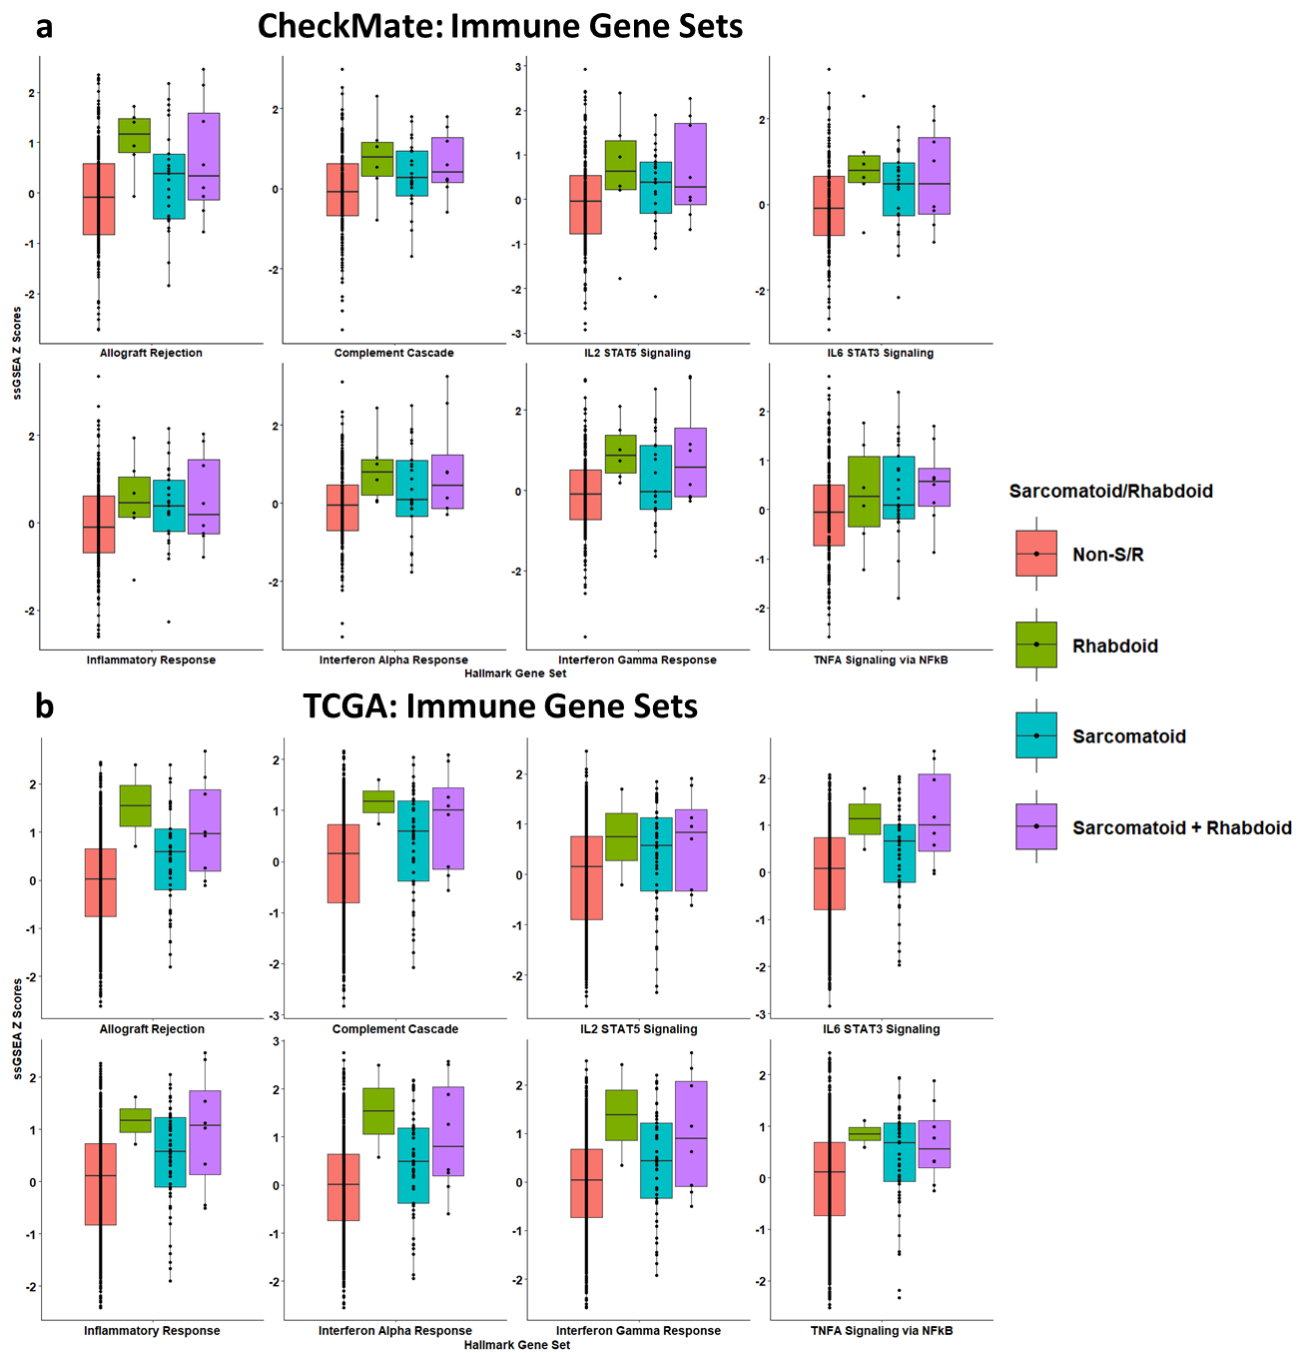

1396 **Figure S9:**

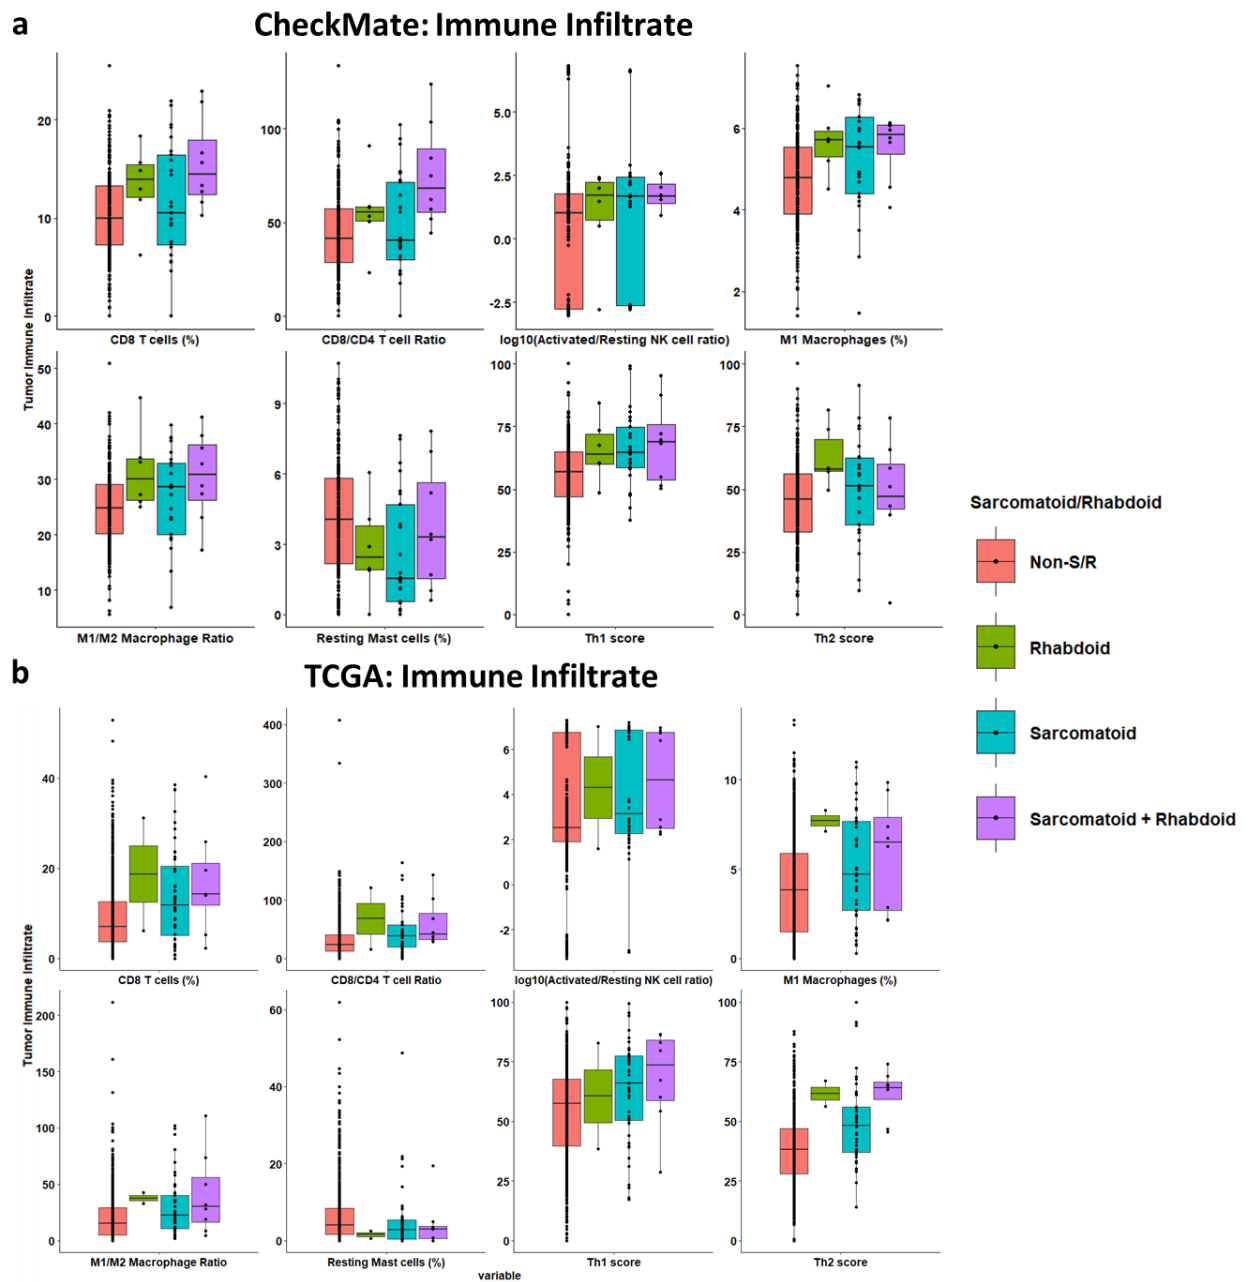

1397

1398



1399 **Figure S10:**

1400

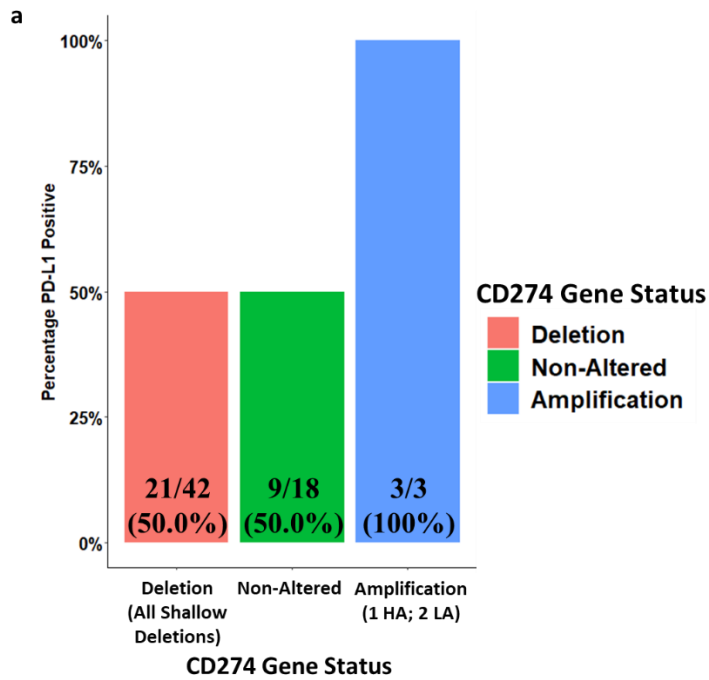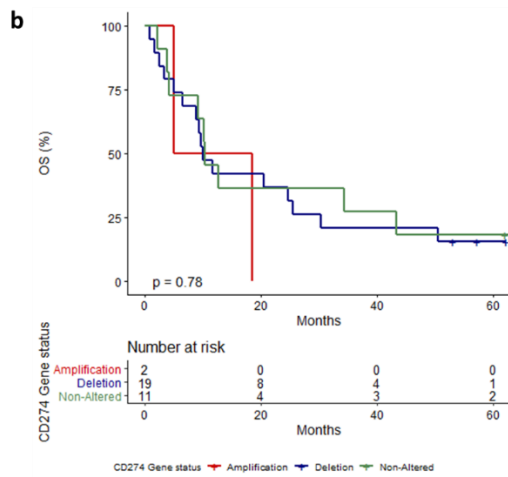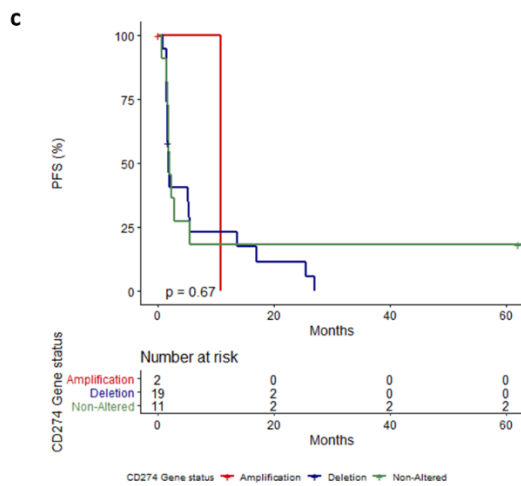

1401

1402 **Figure S11:**

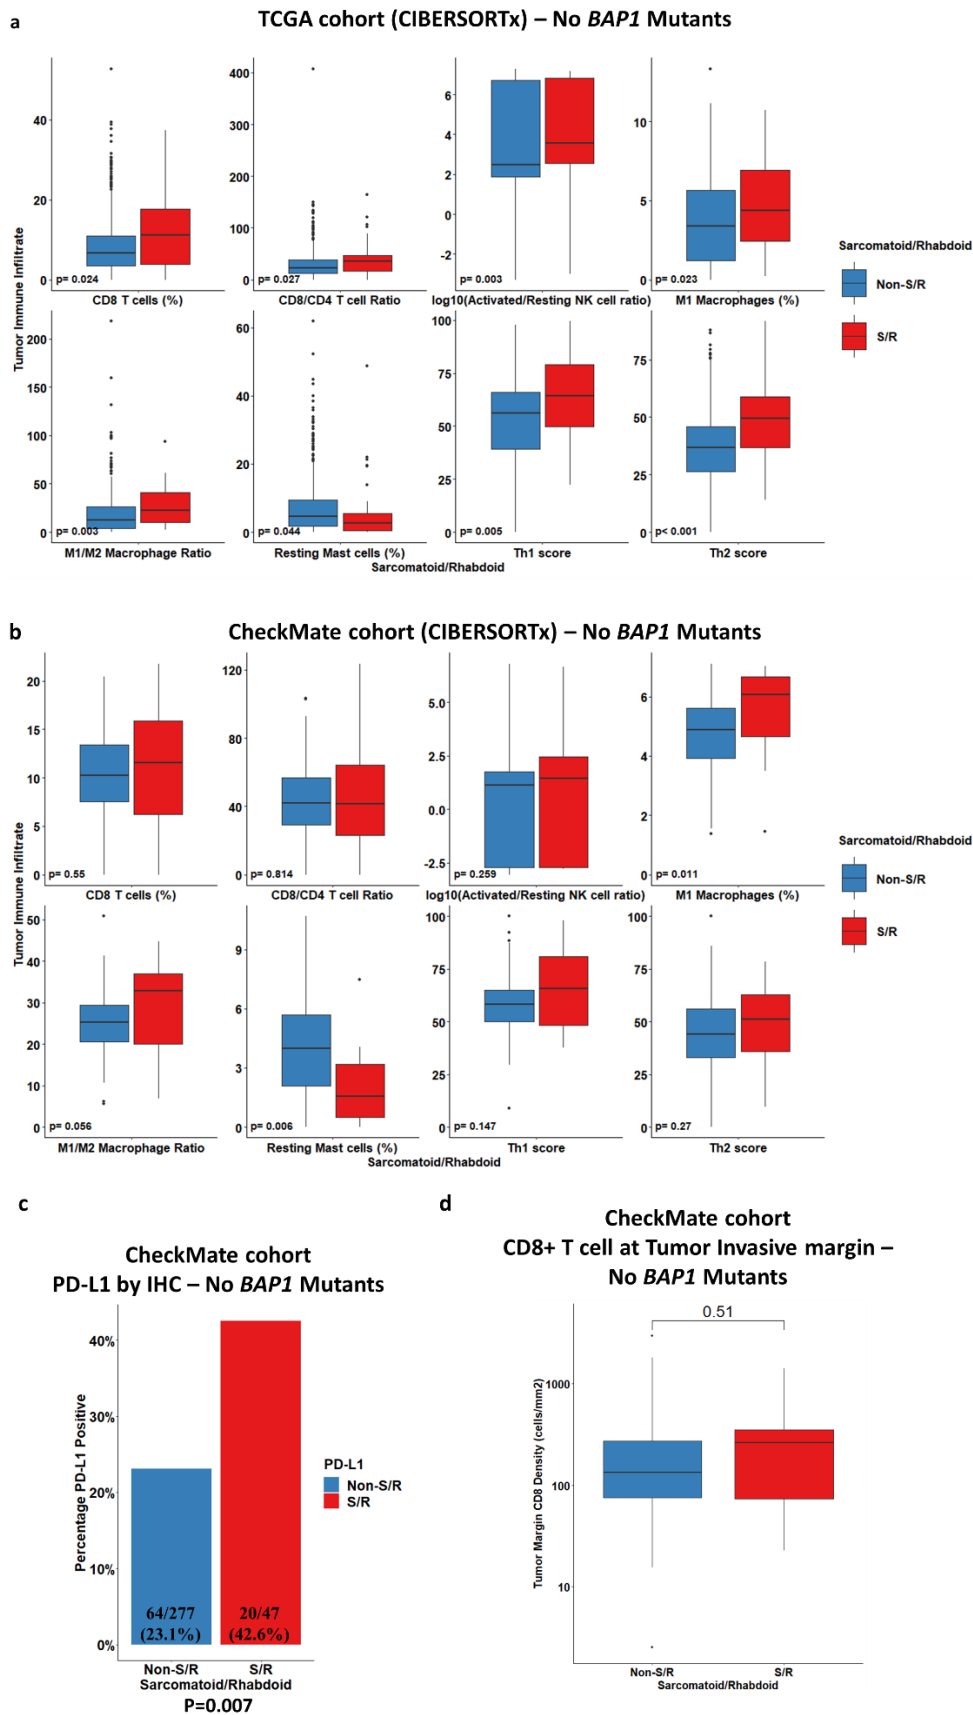

1403

1404

1405 **Figure S12:**

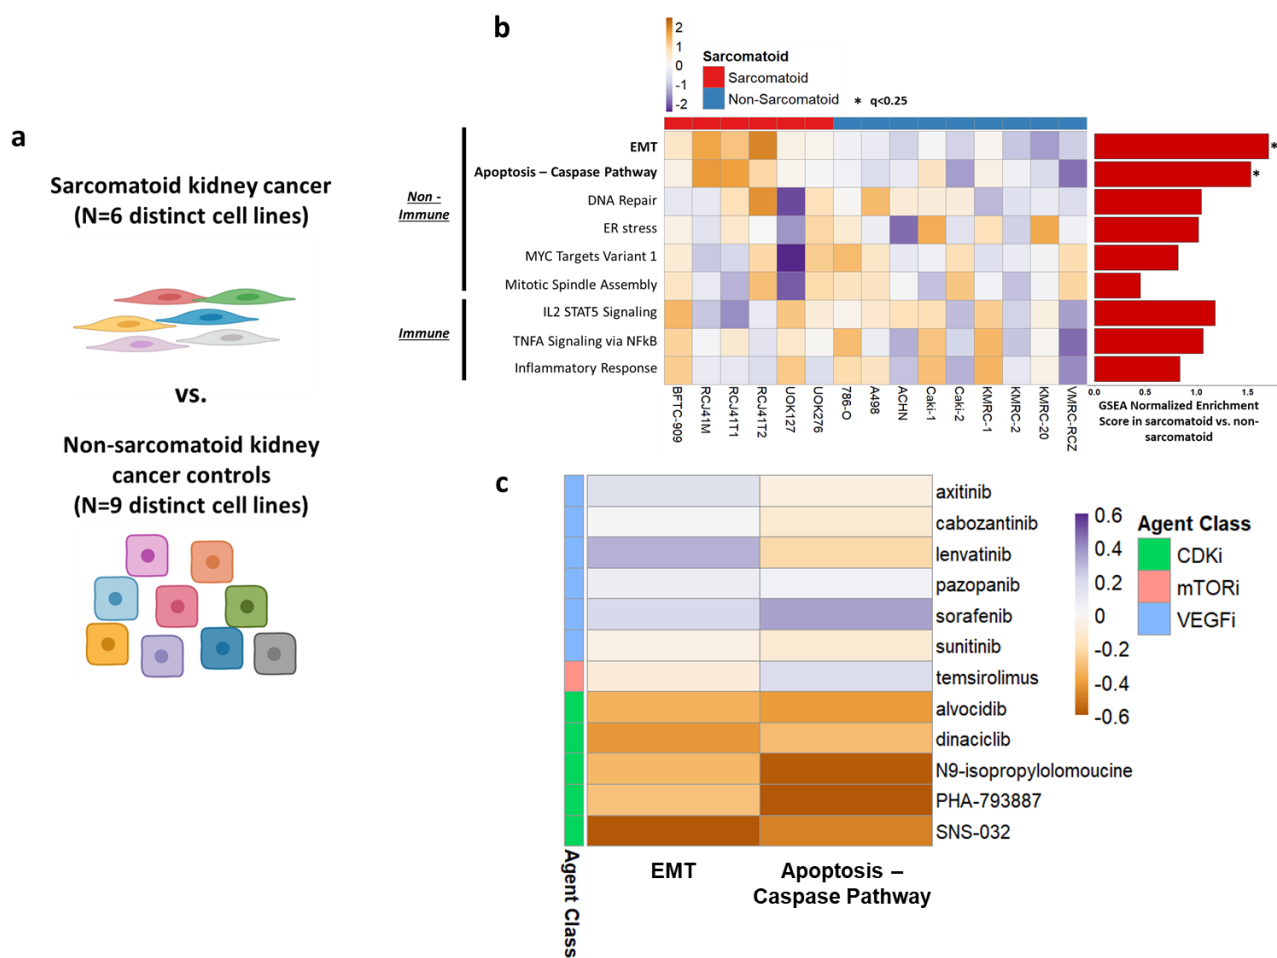

1406

1407

1408 **Figure S13:**

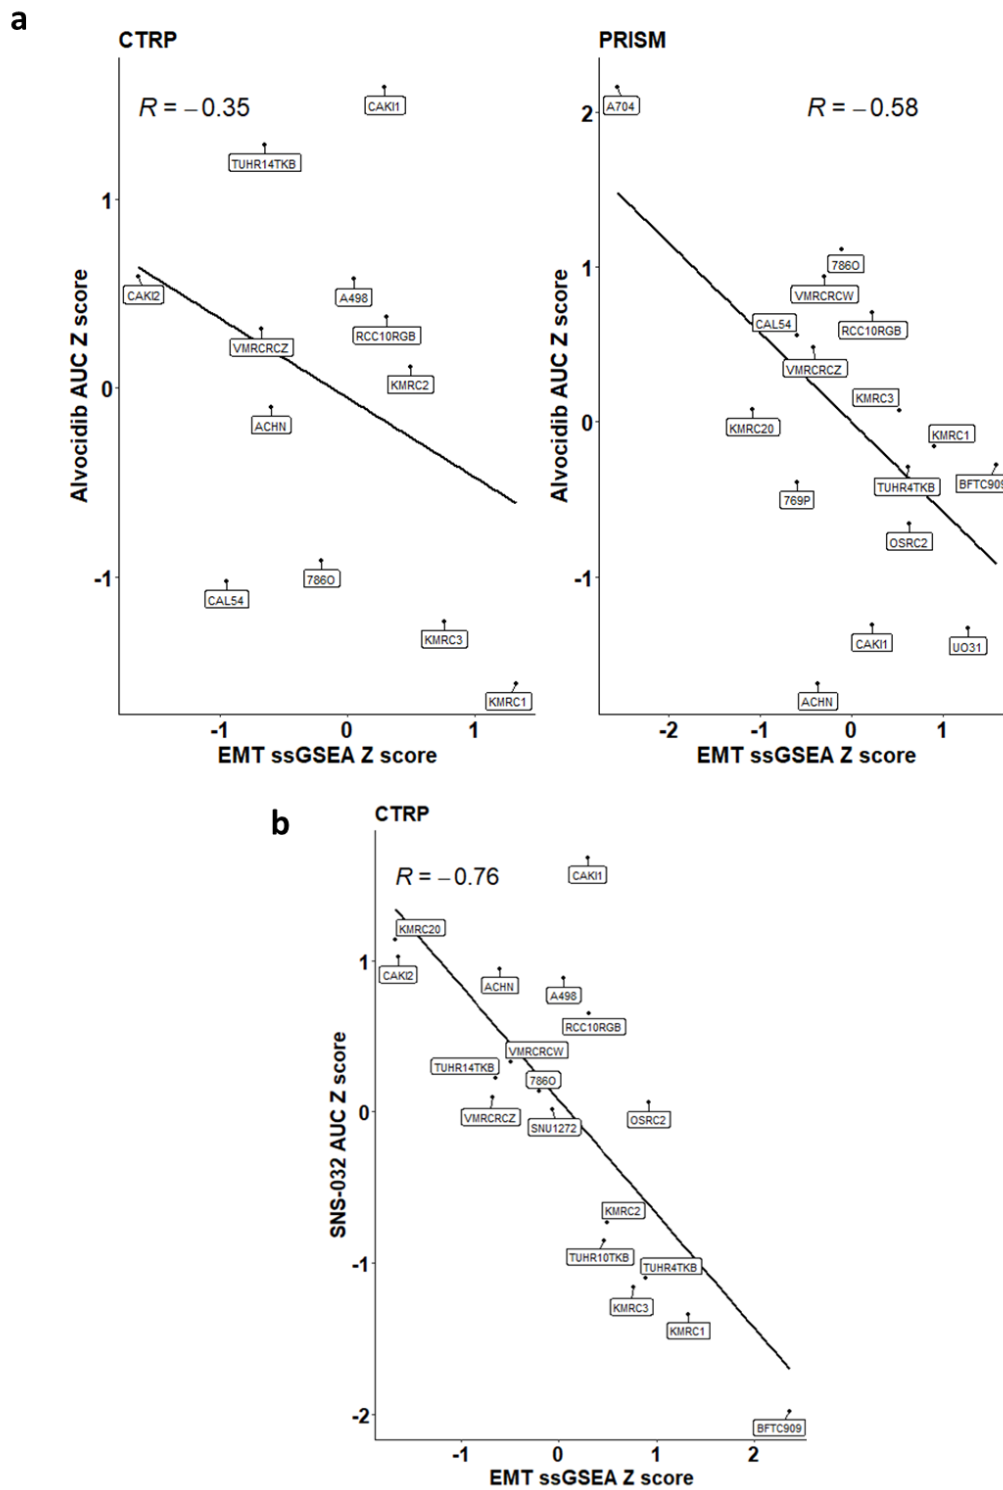

1409

1410

1411 **Figure S14:**

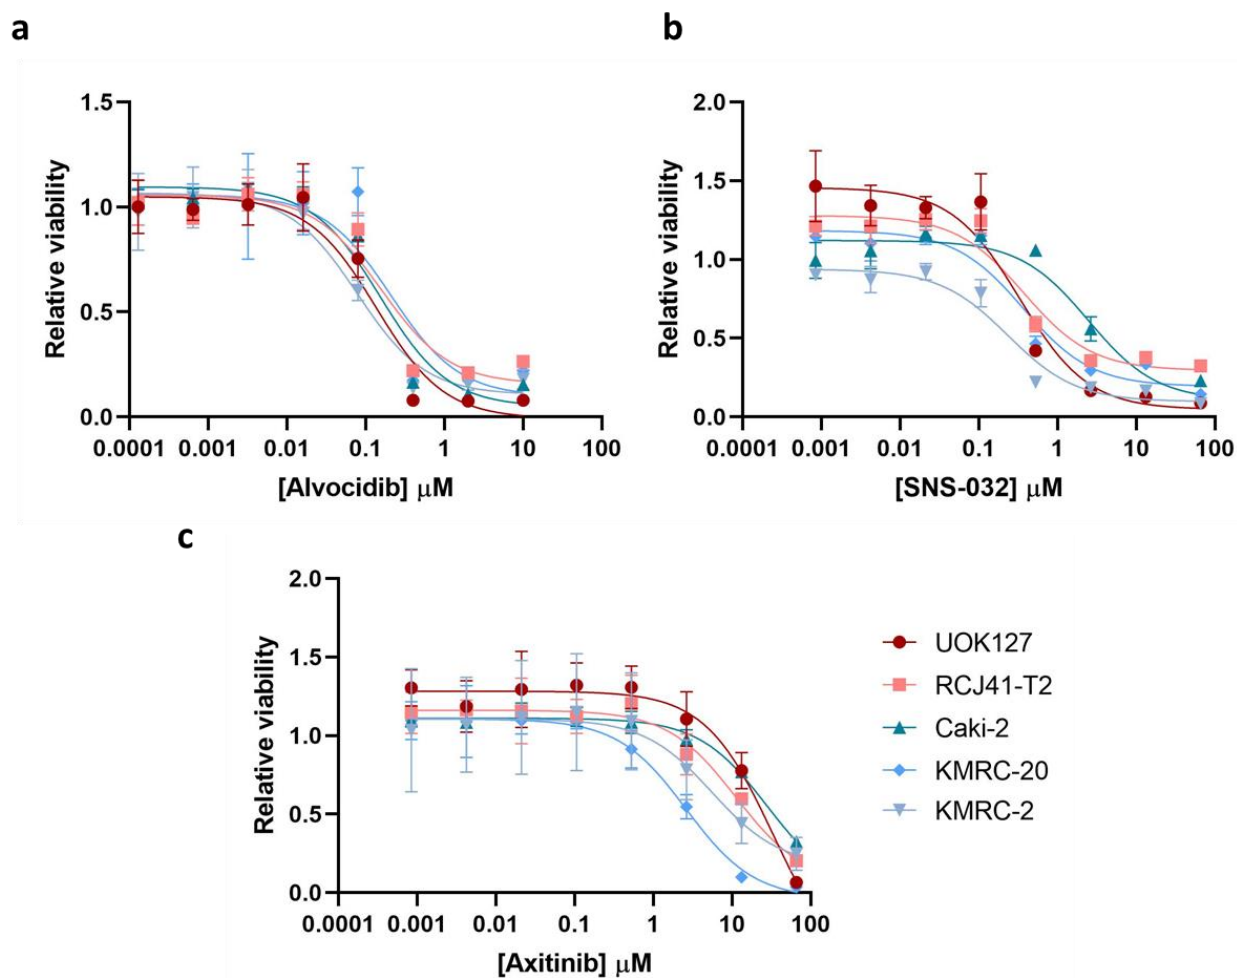

1412

1413

1414 **Figure S15:**

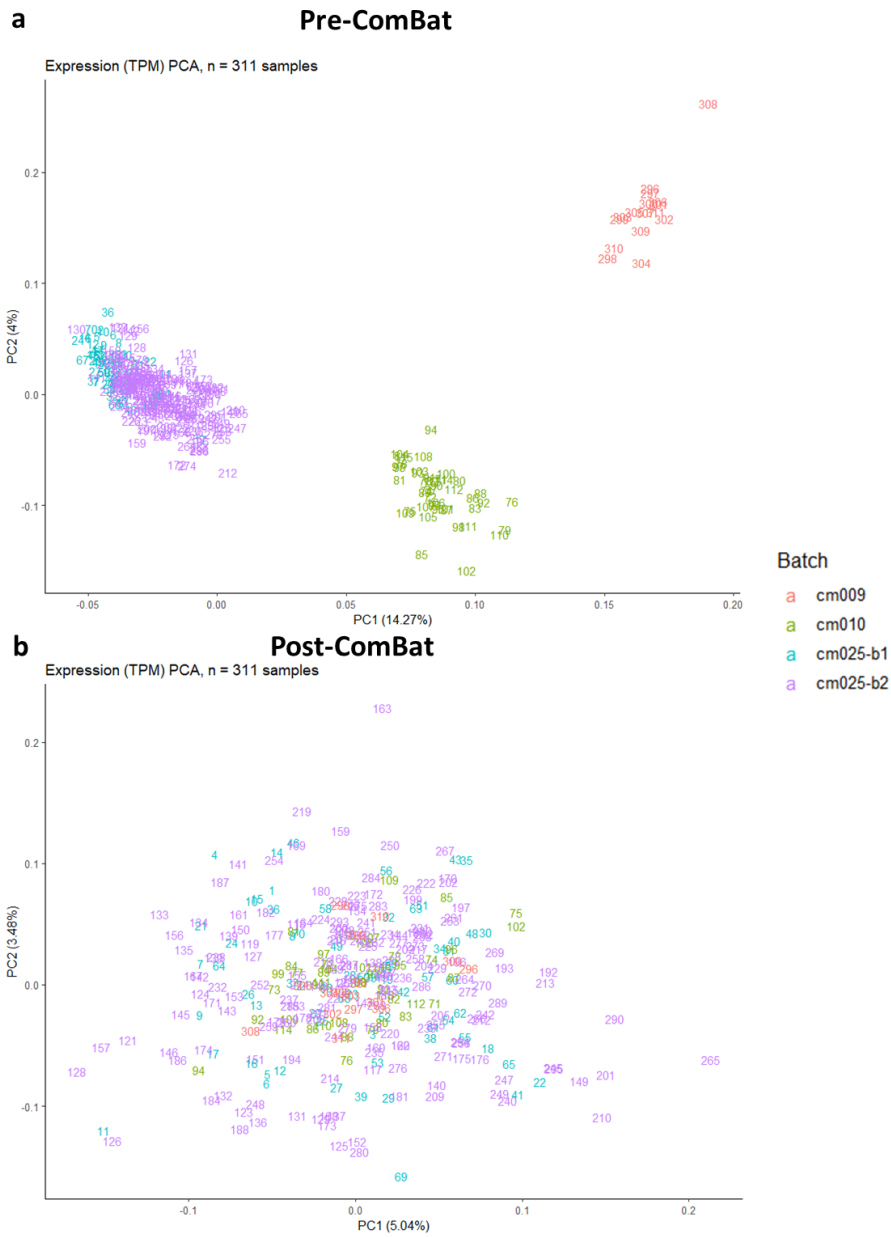

1415

1416
